# Supplementary material
Source: PubMed Central journal article supplement (PMC6438760)
Supplement: NIHMS993893-supplement-1.pdf [file NIHMS993893-supplement-1.pdf]

# Supporting Information

## Structure and Protein Interaction-based Gene

## Ontology Annotations Reveal Likely Functions of

## Uncharacterized Proteins on Human Chromosome

17

*Chengxin Zhang, Xiaoqiong Wei, Gilbert S. Omenn, and Yang Zhang*

### Table of Contents

|                                                                                                                                                                                                             |           |
|-------------------------------------------------------------------------------------------------------------------------------------------------------------------------------------------------------------|-----------|
| <b>Text S1.</b> SPARQL query for curating the list of uPE1 proteins from neXtProt database version 2018-01-17 .....                                                                                         | <b>S2</b> |
| <b>Text S1.</b> SPARQL query for curating the initial list of unannotated proteins from neXtProt database.....                                                                                              | <b>S3</b> |
| <b>Text S3.</b> Benchmark set of 100 well annotated PE1 proteins randomly selected from chromosome 17.....                                                                                                  | <b>S4</b> |
| <b>Table S1.</b> Fmax of different programs for GO prediction using UniProt and neXtProt annotation as gold standard for the benchmark set of 100 chromosome 17 PE1 proteins .....                          | <b>S5</b> |
| <b>Table S2.</b> Fmax of “structure” component and the final consensus prediction in COFACTOR for a benchmark set of 59 proteins with experimental structure covering at least 30% of target sequence ..... | <b>S6</b> |
| <b>Table S3.</b> COFACTOR predicted functions for 66 uPE1 protein on chromosome 17 .....                                                                                                                    | <b>S8</b> |

**Text S1.** SPARQL query for curating the list of uPE1 proteins from neXtProt database version 2018-01-17, which excluded six more GO terms (GO:0005524. ATP binding; GO:0000287 magnesium binding; GO:0003676 nucleic acid binding; GO:0003824 catalytic activity; GO:0007165 signal transduction; GO:0035556 intracellular signal transduction) in addition to the GO terms excluded by neXtProt 2017-08-01 (Text S2). Due to the exclusion of more GO terms, the number of uPE1 proteins has increased from 1218 in neXtProt version 2017-08-01 to 1260 in neXtProt version 2018-01-17.

```

select distinct ?entry where {
  ?entry :isoform ?iso.
  ?entry :existence :Evidence_at_protein_level.
  filter not exists { ?iso :functionInfo ?_ . }
  filter not exists { ?iso :function ?func .
    optional {?func :term ?fterm1 .}
    filter(!bound(?fterm1)) #eliminates
functions from pathways
  }
  filter not exists {
    ?iso :function / :term ?fterm .
    filter(?fterm != cv:GO_0005524 && ?fterm
!= cv:GO_0000287 && ?fterm != cv:GO_0005515 && ?fterm !=
cv:GO_0042802
    && ?fterm != cv:GO_0008270 &&
?fterm != cv:GO_0051260 && ?fterm != cv:GO_0005509
    && ?fterm != cv:GO_0003676 &&
?fterm != cv:GO_0003824 && ?fterm != cv:GO_0007165 && ?fterm !=
cv:GO_0035556)
    # eliminates proteins whose ONLY GO
functions are one of ATP-binding, magnesium-binding, calcium-
binding, zinc-binding,
    # nucleic acid binding, protein-binding,
identical protein binding, protein homooligomerization,
catalytic activity, signal transduction,
  }
}

```

**Text S2.** SPARQL query for curating the initial list of unannotated proteins from neXtProt database. To curate the initial list of 66 uPE1 proteins, the following SPARQL query is used at neXtProt website version 2017-08-01 at <https://www.nextprot.org/proteins/search?mode=advanced>. The full list of 1232 uPE1 proteins is subsequently filtered by selecting proteins from chromosome 17. Due to the difference in database version, the same SPARQL query against the current neXtProt may return a slightly different list of uPE1 proteins. For example, as of neXtProt version 2018-01-17, the same SPARQL query retrieved 1218 entries. As an additional note, neXtProt version 2018-01-17 updated its definition of unannotated proteins by excluding in total 11 GO terms, including the 5 GO terms listed below (Text S1).

```

select distinct ?entry ?fterm where {
  ?entry :isoform ?iso.
  ?entry :existence :Evidence_at_protein_level .
  filter not exists { ?iso :functionInfo ?_ . }
  filter not exists { ?iso :function ?func .
    optional {?func :term ?fterm1 .}
    filter(!bound(?fterm1)) #eliminates
functions from pathways
  }
  filter not exists {
    ?iso :function / :term ?fterm .
    filter(?fterm != cv:GO_0005515 && ?fterm
!= cv:GO_0042802 && ?fterm != cv:GO_0005509 && ?fterm !=
cv:GO_0008270 && ?fterm != cv:GO_0051260)
    # eliminates proteins whose ONLY GO
function is one of calcium-binding, zinc-binding, protein-
binding, identical protein binding, protein homooligomerization
  }
}

```

**Text S3.** Benchmark set of 100 well annotated PE1 proteins randomly selected from chromosome 17. Only the canonical isoform listed by neXtProt is used for benchmark testing. The full list of benchmark proteins are: NX\_P04626, NX\_P04637, NX\_Q9GZM8, NX\_P02749, NX\_P50616, NX\_Q96GD4, NX\_Q9GZT4, NX\_Q9UKF7, NX\_O75771, NX\_Q13227, NX\_Q9HC21, NX\_Q96FM1, NX\_P32322, NX\_Q13829, NX\_Q8N9F7, NX\_Q15078, NX\_P46108, NX\_Q9UGN4, NX\_Q9UH92, NX\_Q9NRY6, NX\_P14415, NX\_Q07021, NX\_Q9BXJ1, NX\_Q9Y6N1, NX\_P35232, NX\_Q9Y5W9, NX\_Q00169, NX\_Q969T9, NX\_Q9BZG1, NX\_Q96H20, NX\_Q86V81, NX\_P62258, NX\_P61289, NX\_Q9H2A7, NX\_Q8N2A8, NX\_O95249, NX\_Q07955, NX\_Q8WVN6, NX\_Q7Z4W1, NX\_O95476, NX\_Q8IW40, NX\_Q13432, NX\_P09564, NX\_Q92988, NX\_Q0VD86, NX\_Q9UNK0, NX\_O60248, NX\_Q13253, NX\_P60008, NX\_Q9BYE0, NX\_P16035, NX\_Q86UA6, NX\_P62993, NX\_P01241, NX\_P09629, NX\_P51148, NX\_Q9UKL6, NX\_Q9BQB4, NX\_Q16613, NX\_Q14197, NX\_Q96FZ7, NX\_Q8TCD5, NX\_P12829, NX\_Q9Y584, NX\_P60763, NX\_Q86XA0, NX\_Q9HD47, NX\_P51452, NX\_Q9NQ92, NX\_Q9BRG1, NX\_O60895, NX\_P62253, NX\_Q96F10, NX\_O15273, NX\_O75947, NX\_P62750, NX\_Q15649, NX\_P63241, NX\_P15531, NX\_P61254, NX\_O15392, NX\_P07737, NX\_P62829, NX\_P84243, NX\_P61353, NX\_Q8IY31, NX\_O14907, NX\_Q9BRA2, NX\_Q86WV5, NX\_Q8WVK7, NX\_O95166, NX\_P63272, NX\_P63027, NX\_Q86UU9, NX\_P41567, NX\_P13500, NX\_P61956, NX\_P10147, NX\_Q9NYG5, NX\_A8MT69, NX\_P63173, NX\_O14610.

**Table S2.** Fmax of different programs for GO prediction using UniProt and neXtProt annotation as gold standard for the benchmark set of 100 chromosome 17 PE1 proteins.

|              | UniProt (EXP, IDA, IMP, IGI, IEP, TAS, IC) |              |              | neXtProt (Gold evidence) |              |              | neXtProt (Gold and Silver evidence) |              |              |
|--------------|--------------------------------------------|--------------|--------------|--------------------------|--------------|--------------|-------------------------------------|--------------|--------------|
|              | MF                                         | BP           | CC           | MF                       | BP           | CC           | MF                                  | BP           | CC           |
| BLAST        | 0.225                                      | 0.206        | 0.312        | 0.320                    | 0.235        | 0.340        | 0.312                               | 0.234        | 0.351        |
| PSIBLAST     | 0.253                                      | 0.188        | 0.314        | 0.332                    | 0.230        | 0.348        | 0.334                               | 0.243        | 0.359        |
| GoFDR        | 0.355                                      | 0.341        | 0.447        | 0.472                    | 0.376        | 0.476        | 0.447                               | 0.364        | 0.479        |
| GOtcha       | 0.251                                      | 0.195        | 0.414        | 0.321                    | 0.219        | 0.444        | 0.454                               | 0.219        | 0.454        |
| Naïve        | 0.346                                      | 0.281        | 0.509        | 0.142                    | 0.302        | 0.469        | 0.146                               | 0.322        | 0.486        |
| sequence     | 0.378                                      | 0.358        | 0.479        | 0.476                    | 0.406        | 0.515        | 0.458                               | 0.395        | 0.512        |
| PPI          | 0.244                                      | 0.347        | 0.451        | 0.279                    | 0.394        | 0.496        | 0.291                               | 0.401        | 0.530        |
| sequence+PPI | 0.382                                      | 0.398        | 0.510        | 0.476                    | 0.451        | 0.552        | 0.461                               | 0.444        | 0.572        |
| structure    | 0.498                                      | 0.431        | 0.499        | 0.647                    | 0.490        | 0.547        | 0.648                               | 0.512        | 0.571        |
| COFACTOR     | <b>0.545</b>                               | <b>0.497</b> | <b>0.599</b> | <b>0.693</b>             | <b>0.573</b> | <b>0.669</b> | <b>0.689</b>                        | <b>0.591</b> | <b>0.688</b> |

The upper block includes three different control methods (BLAST, PSIBLAST, Naïve) used as baseline algorithms in CAFA function annotation experiments and two top performing sequence-based function prediction methods. In the lower block, “sequence”, “PPI”, and “structure” are the three component methods of “COFACTOR”, which combines these three components by weighted average. The program with the highest Fmax at each category is highlighted by bold. Both neXtProt and UniProt assigns GO terms to proteins using different evidence codes, with “gold” in neXtProt and “EXP, IDA, IMP, IGI, IEP, TAS, IC” in UniProt standing for confident function annotation with reliable literature references, typically with low throughput wet lab experiments.

**Table S2.** Fmax of “structure” component and the final consensus prediction in COFACTOR for a benchmark set of 59 proteins with experimental structure covering at least 30% of target sequence.

| neXtProt ID <sup>a</sup> | PDB chain ID <sup>b</sup> | Target coverage <sup>c</sup> | TM-score <sup>d</sup> | structure <sup>e</sup> |       |       | COFACTOR <sup>f</sup> |       |       |
|--------------------------|---------------------------|------------------------------|-----------------------|------------------------|-------|-------|-----------------------|-------|-------|
|                          |                           |                              |                       | MF                     | BP    | CC    | MF                    | BP    | CC    |
| NX_O14907                | 2l4tA                     | 1.000                        | 0.659                 | 1.000                  | 0.861 | 0.800 | 1.000                 | 0.805 | 0.815 |
| NX_O95166                | 3wimA                     | 1.000                        | 0.957                 | 0.941                  | 0.892 | 0.784 | 0.941                 | 0.921 | 0.779 |
| NX_P15531                | 3l7uC                     | 1.000                        | 0.989                 | 0.771                  | 0.182 | 0.700 | 0.795                 | 0.298 | 0.718 |
| NX_P41567                | 2if1A                     | 1.000                        | 0.902                 | 1.000                  | 0.133 | 1.000 | 1.000                 | 0.667 | 0.727 |
| NX_P61956                | 2n9eB                     | 1.000                        | 0.697                 | 0.941                  | 0.860 | 0.762 | 0.941                 | 0.860 | 1.000 |
| NX_P63272                | 3h7hA                     | 1.000                        | 0.990                 | 0.591                  | 0.695 | 0.800 | 0.591                 | 0.695 | 0.800 |
| NX_Q7Z4W1                | 3d3wB                     | 1.000                        | 0.996                 | 0.933                  | 0.525 | 0.857 | 0.933                 | 0.559 | 0.955 |
| NX_Q9NYG5                | 5g05B                     | 1.000                        | 0.692                 | 0.917                  | 0.585 | 0.897 | 0.917                 | 0.583 | 0.897 |
| NX_P46108                | 2eyzA                     | 0.997                        | 0.996                 | 0.667                  | 0.483 | 0.800 | 0.615                 | 0.474 | 0.750 |
| NX_P07737                | 3chwP                     | 0.993                        | 0.980                 | 0.258                  | 0.611 | 0.423 | 0.404                 | 0.662 | 0.730 |
| NX_P61353                | 5t2cT                     | 0.993                        | 0.943                 | 0.500                  | 0.814 | 0.522 | 0.500                 | 0.814 | 0.522 |
| NX_P63173                | 5t2ce                     | 0.986                        | 0.877                 | 1.000                  | 0.857 | 0.944 | 1.000                 | 0.897 | 0.971 |
| NX_Q9BRG1                | 3cuqC                     | 0.983                        | 0.996                 | 1.000                  | 0.553 | 0.807 | 1.000                 | 0.606 | 0.879 |
| NX_O15392                | 3uedC                     | 0.979                        | 0.971                 | 0.938                  | 0.895 | 0.899 | 1.000                 | 0.909 | 0.959 |
| NX_P62993                | 1griB                     | 0.972                        | 0.982                 | 0.800                  | 0.565 | 0.824 | 0.849                 | 0.631 | 0.873 |
| NX_P51452                | 3f81B                     | 0.968                        | 0.985                 | 0.923                  | 0.968 | 0.811 | 0.960                 | 0.943 | 0.878 |
| NX_Q9BRA2                | 1wouA                     | 0.968                        | 0.926                 | 1.000                  | 1.000 | 1.000 | 0.900                 | 0.698 | 1.000 |
| NX_Q00169                | 1uw5C                     | 0.967                        | 0.995                 | 0.552                  | 1.000 | 0.250 | 0.552                 | 1.000 | 0.421 |
| NX_Q8TCD5                | 2i7dA                     | 0.960                        | 0.986                 | 0.857                  | 0.808 | 0.963 | 0.968                 | 0.767 | 0.963 |
| NX_Q86WV5                | 4joiD                     | 0.959                        | 0.987                 | 0.750                  | 0.730 | 0.750 | 0.750                 | 0.811 | 0.900 |
| NX_P62829                | 4v6xCV                    | 0.950                        | 0.954                 | 1.000                  | 0.623 | 0.546 | 1.000                 | 0.623 | 0.600 |
| NX_Q9UKL6                | 1ln1A                     | 0.949                        | 0.990                 | 1.000                  | 1.000 | 1.000 | 0.571                 | 0.533 | 1.000 |
| NX_Q9GZT4                | 3l6bA                     | 0.944                        | 0.951                 | 1.000                  | 0.790 | 0.800 | 0.979                 | 0.793 | 0.800 |
| NX_P02749                | 1c1zA                     | 0.942                        | 0.990                 | 0.960                  | 0.794 | 0.745 | 0.923                 | 0.788 | 0.760 |
| NX_A8MT69                | 4draH                     | 0.938                        | 0.946                 | 0.833                  | 0.756 | 1.000 | 1.000                 | 0.829 | 1.000 |
| NX_P61254                | 5t2cS                     | 0.924                        | 0.961                 | 0.909                  | 0.841 | 0.727 | 0.909                 | 0.841 | 0.727 |
| NX_Q96F10                | 2q4vB                     | 0.924                        | 0.891                 | 0.941                  | 1.000 | 0.870 | 0.875                 | 0.732 | 0.714 |
| NX_P60763                | 2ov2B                     | 0.922                        | 0.963                 | 0.980                  | 0.245 | 0.627 | 0.980                 | 0.457 | 0.600 |
| NX_P62258                | 3ualA                     | 0.902                        | 0.981                 | 0.718                  | 0.493 | 0.737 | 0.718                 | 0.482 | 0.737 |
| NX_Q8WVK7                | 4aj5T                     | 0.901                        | 0.825                 | 1.000                  | 0.667 | 0.929 | 1.000                 | 0.417 | 0.788 |
| NX_P63241                | 5dlqF                     | 0.890                        | 0.948                 | 0.783                  | 0.815 | 0.913 | 0.783                 | 0.800 | 0.958 |
| NX_Q9BQB4                | 2k8pA                     | 0.887                        | 0.900                 | 1.000                  | 0.959 | 0.400 | 1.000                 | 0.932 | 0.500 |
| NX_P16035                | 1gxdD                     | 0.873                        | 0.922                 | 0.929                  | 0.722 | 0.900 | 0.929                 | 0.880 | 0.957 |
| NX_P32322                | 5uawE                     | 0.862                        | 0.988                 | 0.909                  | 0.933 | 0.333 | 0.909                 | 0.933 | 0.933 |
| NX_Q13253                | 1m4uA                     | 0.858                        | 0.969                 | 0.800                  | 0.770 | 1.000 | 0.727                 | 0.782 | 1.000 |
| NX_P01241                | 1bp3A                     | 0.853                        | 0.765                 | 1.000                  | 0.938 | 1.000 | 1.000                 | 0.919 | 1.000 |
| NX_Q96H20                | 3cuqA                     | 0.849                        | 0.989                 | 1.000                  | 0.852 | 0.949 | 0.889                 | 0.887 | 0.963 |
| NX_P62750                | 4v6xCX                    | 0.776                        | 0.898                 | 0.737                  | 0.957 | 0.558 | 0.737                 | 0.971 | 0.640 |
| NX_P13500                | 1donB                     | 0.768                        | 0.841                 | 0.857                  | 0.615 | 0.571 | 0.933                 | 0.676 | 0.750 |
| NX_P10147                | 5corJ                     | 0.761                        | 0.849                 | 0.981                  | 0.901 | 0.800 | 0.981                 | 0.908 | 0.800 |
| NX_P51148                | 4kyiH                     | 0.755                        | 0.973                 | 1.000                  | 0.516 | 0.702 | 1.000                 | 0.564 | 0.849 |
| NX_Q13432                | 3gqqD                     | 0.738                        | 0.968                 | 1.000                  | 0.829 | 0.938 | 0.154                 | 0.815 | 0.769 |
| NX_P84243                | 3wtpE                     | 0.735                        | 0.968                 | 0.964                  | 0.469 | 0.842 | 0.964                 | 0.469 | 0.842 |
| NX_Q96GD4                | 4af3A                     | 0.733                        | 0.905                 | 0.941                  | 0.746 | 0.892 | 0.968                 | 0.693 | 0.941 |

|                                 |       |       |       |       |       |       |       |       |       |
|---------------------------------|-------|-------|-------|-------|-------|-------|-------|-------|-------|
| NX_P62253                       | 2awfA | 0.677 | 0.952 | 1.000 | 0.857 | 0.846 | 1.000 | 0.857 | 0.846 |
| NX_Q07021                       | 1p32A | 0.645 | 0.972 | 0.926 | 0.912 | 0.826 | 0.893 | 0.933 | 0.923 |
| NX_Q14197                       | 5oomp | 0.617 | 0.919 | 0.867 | 1.000 | 0.839 | 0.867 | 1.000 | 0.973 |
| NX_Q9Y5W9                       | 4ikdA | 0.526 | 0.729 | 0.750 | 0.667 | 0.346 | 0.857 | 0.947 | 0.900 |
| NX_P04637                       | 2fejA | 0.519 | 0.873 | 0.914 | 0.868 | 0.901 | 0.953 | 0.873 | 0.932 |
| NX_O15273                       | 1ya5T | 0.509 | 0.752 | 0.000 | 0.081 | 0.300 | 0.148 | 0.351 | 0.667 |
| NX_Q15078                       | 3o0gE | 0.485 | 0.914 | 0.800 | 0.762 | 0.805 | 0.800 | 0.769 | 0.868 |
| NX_P04626                       | 3n85A | 0.482 | 0.491 | 0.805 | 0.557 | 0.519 | 0.769 | 0.654 | 0.739 |
| NX_Q15649                       | 5l85A | 0.458 | 0.469 | 0.353 | 0.000 | 0.182 | 0.462 | 0.522 | 0.600 |
| NX_O60895                       | 2xvtC | 0.451 | 0.905 | 0.074 | 0.076 | 0.286 | 0.759 | 0.564 | 0.667 |
| NX_Q07955                       | 2o3dA | 0.440 | 0.566 | 0.714 | 0.453 | 0.655 | 0.909 | 0.625 | 0.727 |
| NX_Q9UGN4                       | 2q87C | 0.351 | 0.793 | 0.400 | 0.054 | 0.235 | 0.316 | 0.371 | 0.686 |
| NX_P50616                       | 2z15A | 0.339 | 0.315 | 0.000 | 0.250 | 0.286 | 0.286 | 0.474 | 0.833 |
| NX_Q9GZM8                       | 2v66E | 0.322 | 0.559 | 0.222 | 0.256 | 0.459 | 0.182 | 0.418 | 0.680 |
| NX_Q86V81                       | 3ulhA | 0.319 | 0.684 | 0.727 | 0.443 | 0.450 | 1.000 | 0.683 | 0.597 |
| Average                         |       | 0.805 | 0.877 | 0.799 | 0.669 | 0.717 | 0.809 | 0.718 | 0.810 |
| Pearson correlation to TM-score |       |       |       | 0.435 | 0.400 | 0.432 | 0.286 | 0.249 | 0.161 |

<sup>a</sup> This set of 59 proteins is a subset from the benchmark set of 100 well annotated PE1 proteins from chromosome 17. The table is sorted in descending order of target coverage.

<sup>b</sup> Since the experimental structures do not necessarily cover the full length target sequence, if a target can be mapped to more than one experimental structure, only the structure that has the largest coverage to the target sequence is considered.

<sup>c</sup> “Target coverage” is the portion of query residues covered by corresponding experimental structure.

<sup>d</sup> “TM-score” is the TM-score between the first I-TASSER model and the corresponding experimental structures. I-TASSER model residues not solved in experimental structures are excluded in TM-score calculation.

<sup>e</sup> “structure” columns show the Fmax of structure-based component of COFACTOR pipeline.

<sup>f</sup> “COFACTOR” columns show the Fmax of final consensus COFACTOR function prediction.

**Table S3.** COFACTOR predicted functions for 66 uPE1 protein on chromosome 17 as of neXtProt 2017-08-01. General GO terms associated with more than 20% of annotated UniProt proteins are excluded. For each protein, only GO terms predicted with Cscore > 0.3 are included in the table, with Cscore > 0.5 highlighted in bold. Entries are sorted in descending order of the highest MF Cscore. The 30 uPE1 proteins with MF Cscore > 0.5 are shaded in grey. The first 13 proteins in this list have MF Cscore > 0.59, as reported in Table 1 in main text. Additionally, 33 and 49 proteins in this list have BP Cscore>0.55 and CC Cscore>0.59, respectively. NeXtProt does not use CC terms for classifying uPE1 proteins (see Text S2 for SPARQL query).

|   | NextProt Accession, Gene Name, and Common Name  | Molecular Function (MF)                                                                                                                                                                                                                                                                                                                                                                                                                                                                    | Biological Process (BP)                                                                                                                                                                                                                                                                                                                                                                                                                                                                                                                                                                                                                                                                                                                                                                                                             | Cellular Component (CC)                                                                                                                                                                                                            |
|---|-------------------------------------------------|--------------------------------------------------------------------------------------------------------------------------------------------------------------------------------------------------------------------------------------------------------------------------------------------------------------------------------------------------------------------------------------------------------------------------------------------------------------------------------------------|-------------------------------------------------------------------------------------------------------------------------------------------------------------------------------------------------------------------------------------------------------------------------------------------------------------------------------------------------------------------------------------------------------------------------------------------------------------------------------------------------------------------------------------------------------------------------------------------------------------------------------------------------------------------------------------------------------------------------------------------------------------------------------------------------------------------------------------|------------------------------------------------------------------------------------------------------------------------------------------------------------------------------------------------------------------------------------|
| 1 | NX_Q8TBR7-2, FAM57A. (FAM57A)                   | <b>GO:0016740 (1.00) transferase activity</b><br><b>GO:0050291 (0.99) sphingosine N-acyltransferase activity</b>                                                                                                                                                                                                                                                                                                                                                                           | <b>GO:0032502 (0.69) developmental process</b><br><b>GO:0044767 (0.64) single-organism developmental process</b><br><b>GO:0048856 (0.59) anatomical structure development</b><br><b>GO:1901564 (0.57) organonitrogen compound metabolic process</b><br><b>GO:0006629 (0.57) lipid metabolic process</b><br><b>GO:0048869 (0.55) cellular developmental process</b><br><b>GO:0016043 (0.54) cellular component organization</b><br><b>GO:0007420 (0.54) brain development</b><br><b>GO:0021952 (0.53) central nervous system projection neuron axonogenesis</b><br><b>GO:0001654 (0.53) eye development</b><br>GO:0006672 (0.46) ceramide metabolic process<br>GO:0046467 (0.42) membrane lipid biosynthetic process<br>GO:0046513 (0.41) ceramide biosynthetic process<br>GO:0048523 (0.31) negative regulation of cellular process | <b>GO:0005887 (1.00) integral component of plasma membrane</b><br><b>GO:0005886 (1.00) plasma membrane</b><br><b>GO:0005783 (0.98) endoplasmic reticulum</b><br>GO:0097458 (0.37) neuron part<br>GO:0042995 (0.37) cell projection |
| 2 | NX_Q12767-1, TMEM94. (Transmembrane protein 94) | <b>GO:0043492 (0.91) ATPase activity, coupled to movement of substances</b><br><b>GO:0022892 (0.91) substrate-specific transporter activity</b><br><b>GO:0019829 (0.74) cation-transporting ATPase activity</b><br><b>GO:0022890 (0.61) inorganic cation transmembrane transporter activity</b><br><b>GO:0015662 (0.61) ATPase activity, coupled to transmembrane movement of ions, phosphorylative mechanism</b><br><b>GO:0046873 (0.57) metal ion transmembrane transporter activity</b> | <b>GO:0065008 (0.80) regulation of biological quality</b><br><b>GO:0098771 (0.77) inorganic ion homeostasis</b><br><b>GO:0030003 (0.77) cellular cation homeostasis</b><br><b>GO:0006875 (0.72) cellular metal ion homeostasis</b><br><b>GO:0006810 (0.71) transport</b><br><b>GO:0006812 (0.68) cation transport</b><br><b>GO:0034220 (0.66) ion transmembrane transport</b><br><b>GO:0098662 (0.65) inorganic cation transmembrane transport</b><br><b>GO:1902600 (0.64) hydrogen ion transmembrane transport</b><br><b>GO:0090662 (0.60) ATP hydrolysis coupled transmembrane transport</b>                                                                                                                                                                                                                                      | <b>GO:0005654 (1.00) nucleoplasm</b>                                                                                                                                                                                               |



|   |                                                                       |                                                                                                                                                                                                                                                                                                                                                                                                                                                     |                                                                                                                                                                                                                                                                                                                                                                                                                                                                                                                                                                                                                                                                                                                                                        |                                                                                                                                                                                |
|---|-----------------------------------------------------------------------|-----------------------------------------------------------------------------------------------------------------------------------------------------------------------------------------------------------------------------------------------------------------------------------------------------------------------------------------------------------------------------------------------------------------------------------------------------|--------------------------------------------------------------------------------------------------------------------------------------------------------------------------------------------------------------------------------------------------------------------------------------------------------------------------------------------------------------------------------------------------------------------------------------------------------------------------------------------------------------------------------------------------------------------------------------------------------------------------------------------------------------------------------------------------------------------------------------------------------|--------------------------------------------------------------------------------------------------------------------------------------------------------------------------------|
|   |                                                                       | GO:0015077 (0.41) monovalent inorganic cation transmembrane transporter activity<br>GO:0005524 (0.37) ATP binding<br>GO:0005391 (0.37) sodium:potassium-exchanging ATPase activity                                                                                                                                                                                                                                                                  | <b>GO:0015988 (0.60) energy coupled proton transmembrane transport, against electrochemical gradient</b><br><b>GO:0030004 (0.57) cellular monovalent inorganic cation homeostasis</b><br><b>GO:0030001 (0.56) metal ion transport</b><br><b>GO:0071805 (0.52) potassium ion transmembrane transport</b><br><b>GO:0071436 (0.52) sodium ion export</b>                                                                                                                                                                                                                                                                                                                                                                                                  |                                                                                                                                                                                |
| 3 | NX_Q5BKU9-1, OXLD1. (Oxidoreductase-like domain-containing protein 1) | <b>GO:0016491 (0.87) oxidoreductase activity</b><br><b>GO:0000166 (0.82) nucleotide binding</b><br><b>GO:0071949 (0.73) FAD binding</b><br><b>GO:0004128 (0.73) cytochrome-b5 reductase activity, acting on NAD(P)H</b><br><b>GO:0016211 (0.52) ammonia ligase activity</b><br>GO:0035639 (0.33) purine ribonucleoside triphosphate binding<br>GO:0032559 (0.33) adenylyl ribonucleotide binding<br>GO:0032550 (0.33) purine ribonucleoside binding | GO:0015701 (0.90) bicarbonate transport<br>GO:0009084 (0.53) glutamine family amino acid biosynthetic process<br>GO:0008652 (0.53) cellular amino acid biosynthetic process<br>GO:0006541 (0.53) glutamine metabolic process<br>GO:0071941 (0.34) nitrogen cycle metabolic process                                                                                                                                                                                                                                                                                                                                                                                                                                                                     | GO:0005739 (0.90) mitochondrion<br>GO:0005737 (0.66) cytoplasm                                                                                                                 |
| 4 | NX_A6NGC4-1, TLCD2. (TLC domain-containing protein 2)                 | GO:0016740 (0.86) transferase activity<br>GO:0050291 (0.76) sphingosine N-acyltransferase activity<br>GO:0005216 (0.59) ion channel activity<br>GO:0009881 (0.55) photoreceptor activity                                                                                                                                                                                                                                                            | GO:0006643 (0.76) membrane lipid metabolic process<br>GO:0006672 (0.73) ceramide metabolic process<br>GO:0044765 (0.61) single-organism transport<br>GO:0006811 (0.60) ion transport<br>GO:0034220 (0.58) ion transmembrane transport<br>GO:0019538 (0.58) protein metabolic process<br>GO:0044267 (0.56) cellular protein metabolic process<br>GO:0050896 (0.55) response to stimulus<br>GO:0006464 (0.54) cellular protein modification process<br>GO:0018298 (0.53) protein-chromophore linkage<br>GO:0007602 (0.53) phototransduction<br>GO:0032502 (0.52) developmental process<br>GO:0048856 (0.50) anatomical structure development<br>GO:0046467 (0.48) membrane lipid biosynthetic process<br>GO:0046513 (0.46) ceramide biosynthetic process | GO:0016021 (1.00) integral component of membrane<br>GO:0016020 (1.00) membrane<br>GO:0005783 (0.75) endoplasmic reticulum<br>GO:0005886 (0.55) plasma membrane                 |
| 5 | NX_O43934-1, MFSD11. (UNC93-like protein MFSD11)                      | GO:0005215 (0.85) transporter activity<br>GO:0022857 (0.84) transmembrane transporter activity<br>GO:0022892 (0.78) substrate-specific transporter activity<br>GO:0022891 (0.77) substrate-specific transmembrane transporter activity<br>GO:0051119 (0.74) sugar transmembrane transporter activity<br>GO:0015145 (0.72) monosaccharide transmembrane transporter activity                                                                         | GO:0006810 (0.82) transport<br>GO:0071702 (0.70) organic substance transport<br>GO:0055085 (0.69) transmembrane transport<br>GO:0008643 (0.68) carbohydrate transport<br>GO:0015749 (0.67) monosaccharide transport<br>GO:0008645 (0.66) hexose transport<br>GO:0015758 (0.64) glucose transport<br>GO:0034219 (0.61) carbohydrate transmembrane transport<br>GO:0035428 (0.60) hexose transmembrane transport<br>GO:0046323 (0.47) glucose import<br>GO:0050896 (0.38) response to stimulus                                                                                                                                                                                                                                                           | GO:0016021 (1.00) integral component of membrane<br>GO:0016020 (1.00) membrane<br>GO:0005887 (0.77) integral component of plasma membrane<br>GO:0005886 (0.70) plasma membrane |

|   |                                                     |                                                                                                                                                                                                                                                                                                                                                                                                                                                                                                                                 |                                                                                                                                                                                                                                                                                                                                                                                                                                                                                                                                                                                                                                                                                                                                                                                                                       |                                                                                                                                                                                                                                                                                                                                                                                                                                                                                                                                                                                                                                            |
|---|-----------------------------------------------------|---------------------------------------------------------------------------------------------------------------------------------------------------------------------------------------------------------------------------------------------------------------------------------------------------------------------------------------------------------------------------------------------------------------------------------------------------------------------------------------------------------------------------------|-----------------------------------------------------------------------------------------------------------------------------------------------------------------------------------------------------------------------------------------------------------------------------------------------------------------------------------------------------------------------------------------------------------------------------------------------------------------------------------------------------------------------------------------------------------------------------------------------------------------------------------------------------------------------------------------------------------------------------------------------------------------------------------------------------------------------|--------------------------------------------------------------------------------------------------------------------------------------------------------------------------------------------------------------------------------------------------------------------------------------------------------------------------------------------------------------------------------------------------------------------------------------------------------------------------------------------------------------------------------------------------------------------------------------------------------------------------------------------|
|   |                                                     | <p><b>GO:0015149 (0.71) hexose transmembrane transporter activity</b><br/> <b>GO:0005355 (0.70) glucose transmembrane transporter activity</b><br/> <b>GO:0008324 (0.67) cation transmembrane transporter activity</b><br/> <b>GO:0005351 (0.66) sugar:proton symporter activity</b><br/> GO:0051183 (0.34) vitamin transporter activity<br/> GO:0048029 (0.33) monosaccharide binding<br/> GO:0015146 (0.33) pentose transmembrane transporter activity<br/> GO:0015148 (0.32) D-xylose transmembrane transporter activity</p> | <p>GO:0006820 (0.38) anion transport<br/> GO:0051716 (0.35) cellular response to stimulus<br/> GO:0042221 (0.34) response to chemical<br/> GO:1901700 (0.33) response to oxygen-containing compound</p>                                                                                                                                                                                                                                                                                                                                                                                                                                                                                                                                                                                                               |                                                                                                                                                                                                                                                                                                                                                                                                                                                                                                                                                                                                                                            |
| 6 | NX_Q9P298-1, HIGD1B. (HIG1 domain family member 1B) | <p><b>GO:0016740 (0.79) transferase activity</b><br/> <b>GO:0061630 (0.71) ubiquitin protein ligase activity</b></p>                                                                                                                                                                                                                                                                                                                                                                                                            | <p>GO:0043066 (0.32) negative regulation of apoptotic process<br/> GO:0043623 (0.31) cellular protein complex assembly</p>                                                                                                                                                                                                                                                                                                                                                                                                                                                                                                                                                                                                                                                                                            | <p><b>GO:0043234 (0.88) protein complex</b><br/> <b>GO:0005634 (0.71) nucleus</b><br/> <b>GO:0044429 (0.53) mitochondrial part</b><br/> GO:0005737 (0.46) cytoplasm<br/> GO:0044428 (0.45) nuclear part<br/> GO:0044427 (0.45) chromosomal part<br/> GO:0005739 (0.42) mitochondrion<br/> GO:0016020 (0.38) membrane<br/> GO:0043232 (0.37) intracellular non-membrane-bounded organelle<br/> GO:0016021 (0.36) integral component of membrane<br/> GO:0097249 (0.32) mitochondrial respiratory chain supercomplex<br/> GO:0031305 (0.32) integral component of mitochondrial inner membrane<br/> GO:0031090 (0.30) organelle membrane</p> |
| 7 | NX_Q2TAL5-1, SMTNL2. (Smoothelin-like protein 2)    | <p><b>GO:0008092 (0.77) cytoskeletal protein binding</b><br/> GO:0003779 (0.42) actin binding<br/> GO:1901363 (0.40) heterocyclic compound binding<br/> GO:0097159 (0.40) organic cyclic compound binding<br/> GO:0050660 (0.37) flavin adenine dinucleotide binding<br/> GO:0046983 (0.30) protein dimerization activity<br/> GO:0042802 (0.30) identical protein binding</p>                                                                                                                                                  | <p><b>GO:0016043 (0.70) cellular component organization</b><br/> <b>GO:0032502 (0.69) developmental process</b><br/> <b>GO:0044767 (0.63) single-organism developmental process</b><br/> <b>GO:0048856 (0.59) anatomical structure development</b><br/> GO:0006996 (0.47) organelle organization<br/> GO:0007010 (0.45) cytoskeleton organization<br/> GO:1902589 (0.42) single-organism organelle organization<br/> GO:0048869 (0.41) cellular developmental process<br/> GO:0030029 (0.41) actin filament-based process<br/> GO:0030036 (0.39) actin cytoskeleton organization<br/> GO:0048519 (0.32) negative regulation of biological process<br/> GO:0031032 (0.31) actomyosin structure organization<br/> GO:0048523 (0.30) negative regulation of cellular process<br/> GO:0048468 (0.30) cell development</p> | <p><b>GO:0005737 (0.66) cytoplasm</b><br/> <b>GO:0016020 (0.52) membrane</b><br/> <b>GO:0043232 (0.51) intracellular non-membrane-bounded organelle</b><br/> <b>GO:0044430 (0.50) cytoskeletal part</b><br/> GO:0005856 (0.43) cytoskeleton<br/> GO:0005886 (0.42) plasma membrane<br/> GO:0042995 (0.38) cell projection<br/> GO:0043234 (0.37) protein complex<br/> GO:0044459 (0.36) plasma membrane part<br/> GO:0030054 (0.36) cell junction<br/> GO:0030055 (0.32) cell-substrate junction<br/> GO:0005912 (0.31) adherens junction<br/> GO:0044449 (0.30) contractile fiber part</p>                                                |
| 8 | NX_Q9BQS6-1,                                        | <b>GO:0042802 (0.76) identical</b>                                                                                                                                                                                                                                                                                                                                                                                                                                                                                              | <b>GO:0050896 (0.82) response to stimulus</b>                                                                                                                                                                                                                                                                                                                                                                                                                                                                                                                                                                                                                                                                                                                                                                         | <b>GO:0005634 (0.97) nucleus</b>                                                                                                                                                                                                                                                                                                                                                                                                                                                                                                                                                                                                           |

|    |                                                                                  |                                                                                                                                                                                                                                                                                                                                                                                                                                               |                                                                                                                                                                                                                                                                                                                                                                                                                                                                                                                                                                                                                                                                                                                                                                                                                                                                                                                                                                                                          |                                                                                                                                                                                                                                                                                                                                                                                                                                                                           |
|----|----------------------------------------------------------------------------------|-----------------------------------------------------------------------------------------------------------------------------------------------------------------------------------------------------------------------------------------------------------------------------------------------------------------------------------------------------------------------------------------------------------------------------------------------|----------------------------------------------------------------------------------------------------------------------------------------------------------------------------------------------------------------------------------------------------------------------------------------------------------------------------------------------------------------------------------------------------------------------------------------------------------------------------------------------------------------------------------------------------------------------------------------------------------------------------------------------------------------------------------------------------------------------------------------------------------------------------------------------------------------------------------------------------------------------------------------------------------------------------------------------------------------------------------------------------------|---------------------------------------------------------------------------------------------------------------------------------------------------------------------------------------------------------------------------------------------------------------------------------------------------------------------------------------------------------------------------------------------------------------------------------------------------------------------------|
|    | HSPB9.<br>(Heat shock protein beta-9)                                            | <b>protein binding</b><br>GO:0042803 (0.63) <b>protein homodimerization activity</b><br>GO:0051082 (0.52) <b>unfolded protein binding</b><br>GO:0005212 (0.50) <b>structural constituent of eye lens</b><br>GO:0032182 (0.39) ubiquitin-like protein binding<br>GO:0030291 (0.39) protein serine/threonine kinase inhibitor activity<br>GO:0019900 (0.39) kinase binding<br>GO:0003723 (0.37) RNA binding<br>GO:0043169 (0.35) cation binding | GO:0006950 (0.80) <b>response to stress</b><br>GO:0009628 (0.71) <b>response to abiotic stimulus</b><br>GO:0042221 (0.60) <b>response to chemical</b><br>GO:0009408 (0.60) <b>response to heat</b><br>GO:0016043 (0.56) <b>cellular component organization</b><br>GO:0044767 (0.52) <b>single-organism developmental process</b><br>GO:0048523 (0.51) <b>negative regulation of cellular process</b><br>GO:0042981 (0.51) <b>regulation of apoptotic process</b><br>GO:0006457 (0.51) <b>protein folding</b><br>GO:0043066 (0.50) <b>negative regulation of apoptotic process</b><br>GO:0022607 (0.49) cellular component assembly<br>GO:1901700 (0.48) <b>response to oxygen-containing compound</b><br>GO:0048856 (0.48) <b>anatomical structure development</b><br>GO:0031323 (0.48) <b>regulation of cellular metabolic process</b>                                                                                                                                                                  | GO:0005737 (0.96) <b>cytoplasm</b>                                                                                                                                                                                                                                                                                                                                                                                                                                        |
| 9  | NX_Q96LD4-1,<br>TRIM47.<br>(Tripartite motif-containing protein 47)              | GO:0004842 (0.76) <b>ubiquitin-protein transferase activity</b><br>GO:0061630 (0.31) ubiquitin protein ligase activity                                                                                                                                                                                                                                                                                                                        | GO:0031323 (0.54) <b>regulation of cellular metabolic process</b><br>GO:0019538 (0.54) <b>protein metabolic process</b><br>GO:0060255 (0.53) <b>regulation of macromolecule metabolic process</b><br>GO:0080090 (0.52) <b>regulation of primary metabolic process</b><br>GO:0048518 (0.50) <b>positive regulation of biological process</b><br>GO:0006464 (0.50) <b>cellular protein modification process</b><br>GO:0032446 (0.48) protein modification by small protein conjugation<br>GO:0048522 (0.47) <b>positive regulation of cellular process</b><br>GO:0016567 (0.47) protein ubiquitination<br>GO:0065008 (0.46) <b>regulation of biological quality</b><br>GO:0044764 (0.46) <b>multi-organism cellular process</b><br>GO:0051715 (0.43) <b>cytolysis in other organism</b><br>GO:0010468 (0.41) <b>regulation of gene expression</b><br>GO:2001141 (0.40) <b>regulation of RNA biosynthetic process</b><br>GO:2000112 (0.40) <b>regulation of cellular macromolecule biosynthetic process</b> | GO:0005737 (0.57) <b>cytoplasm</b><br>GO:0016020 (0.41) <b>membrane</b><br>GO:0005634 (0.41) <b>nucleus</b><br>GO:0005576 (0.41) <b>extracellular region</b><br>GO:0043232 (0.38) <b>intracellular non-membrane-bounded organelle</b><br>GO:0043234 (0.35) <b>protein complex</b><br>GO:0044428 (0.32) <b>nuclear part</b>                                                                                                                                                |
| 10 | NX_Q8N7B9-1,<br>EFCAB3.<br>(EF-hand calcium-binding domain-containing protein 3) | GO:0043169 (0.74) <b>cation binding</b><br>GO:0005509 (0.47) calcium ion binding                                                                                                                                                                                                                                                                                                                                                              | GO:0019538 (0.58) <b>protein metabolic process</b><br>GO:0044267 (0.52) <b>cellular protein metabolic process</b><br>GO:0007165 (0.46) <b>signal transduction</b><br>GO:0050896 (0.43) <b>response to stimulus</b><br>GO:0035556 (0.43) <b>intracellular signal transduction</b><br>GO:0006796 (0.42) <b>phosphate-containing compound metabolic process</b><br>GO:0006464 (0.41) <b>cellular protein modification process</b><br>GO:0051179 (0.40) <b>localization</b><br>GO:0006468 (0.40) <b>protein phosphorylation</b><br>GO:0046777 (0.39) <b>protein autophosphorylation</b><br>GO:0042221 (0.39) <b>response to chemical</b>                                                                                                                                                                                                                                                                                                                                                                     | GO:0016020 (0.82) <b>membrane</b><br>GO:0005737 (0.68) <b>cytoplasm</b><br>GO:0005886 (0.66) <b>plasma membrane</b><br>GO:0005634 (0.62) <b>nucleus</b><br>GO:0043234 (0.45) <b>protein complex</b><br>GO:0044459 (0.44) <b>plasma membrane part</b><br>GO:0005829 (0.39) <b>cytosol</b><br>GO:0044430 (0.38) <b>cytoskeletal part</b><br>GO:0097458 (0.33) <b>neuron part</b><br>GO:0031090 (0.31) <b>organelle membrane</b><br>GO:0042995 (0.30) <b>cell projection</b> |

|    |                                                                     |                                                                                                                                                                                                                                                                                                                                                                                                                                                                                                                                     |                                                                                                                                                                                                                                                                                                                                                                                                                                                                                                                                                                                                                                                                                                                                                                                                                                                                       |                                                                                                                                                                                                                                                                                                                                                                                                                                                                                                                                                                                                                     |
|----|---------------------------------------------------------------------|-------------------------------------------------------------------------------------------------------------------------------------------------------------------------------------------------------------------------------------------------------------------------------------------------------------------------------------------------------------------------------------------------------------------------------------------------------------------------------------------------------------------------------------|-----------------------------------------------------------------------------------------------------------------------------------------------------------------------------------------------------------------------------------------------------------------------------------------------------------------------------------------------------------------------------------------------------------------------------------------------------------------------------------------------------------------------------------------------------------------------------------------------------------------------------------------------------------------------------------------------------------------------------------------------------------------------------------------------------------------------------------------------------------------------|---------------------------------------------------------------------------------------------------------------------------------------------------------------------------------------------------------------------------------------------------------------------------------------------------------------------------------------------------------------------------------------------------------------------------------------------------------------------------------------------------------------------------------------------------------------------------------------------------------------------|
|    |                                                                     |                                                                                                                                                                                                                                                                                                                                                                                                                                                                                                                                     | GO:0018105 (0.39) peptidyl-serine phosphorylation<br>GO:0051234 (0.38) establishment of localization<br>GO:0010038 (0.37) response to metal ion<br>GO:0009738 (0.34) abscisic acid-activated signaling pathway                                                                                                                                                                                                                                                                                                                                                                                                                                                                                                                                                                                                                                                        |                                                                                                                                                                                                                                                                                                                                                                                                                                                                                                                                                                                                                     |
| 11 | NX_Q6AI12-1, ANKRD40. (Ankyrin repeat domain-containing protein 40) | GO:0019899 (0.64) enzyme binding<br>GO:0044389 (0.62) ubiquitin-like protein ligase binding<br>GO:0008092 (0.62) cytoskeletal protein binding<br>GO:0030507 (0.57) spectrin binding<br>GO:0008093 (0.57) cytoskeletal adaptor activity<br>GO:0044877 (0.51) macromolecular complex binding<br>GO:0008134 (0.51) transcription factor binding<br>GO:0005048 (0.50) signal sequence binding<br>GO:0005200 (0.49) structural constituent of cytoskeleton<br>GO:0051117 (0.48) ATPase binding<br>GO:0016740 (0.30) transferase activity | GO:0060255 (0.62) regulation of macromolecule metabolic process<br>GO:0007165 (0.62) signal transduction<br>GO:0080090 (0.61) regulation of primary metabolic process<br>GO:0031323 (0.61) regulation of cellular metabolic process<br>GO:0051179 (0.60) localization<br>GO:0048522 (0.60) positive regulation of cellular process<br>GO:0016043 (0.60) cellular component organization<br>GO:0065008 (0.58) regulation of biological quality<br>GO:0050896 (0.58) response to stimulus<br>GO:0048519 (0.58) negative regulation of biological process<br>GO:0006355 (0.58) regulation of transcription, DNA-templated<br>GO:0048523 (0.57) negative regulation of cellular process<br>GO:0010604 (0.57) positive regulation of macromolecule metabolic process<br>GO:0006810 (0.57) transport<br>GO:0031325 (0.56) positive regulation of cellular metabolic process | GO:0005737 (0.77) cytoplasm<br>GO:0005634 (0.65) nucleus<br>GO:0016020 (0.63) membrane<br>GO:0005886 (0.55) plasma membrane<br>GO:0044459 (0.51) plasma membrane part<br>GO:0043234 (0.51) protein complex<br>GO:0016021 (0.46) integral component of membrane<br>GO:0005829 (0.43) cytosol<br>GO:0097458 (0.34) neuron part                                                                                                                                                                                                                                                                                        |
| 12 | NX_Q6UX52-1, C17orf99. (Uncharacterized protein C17orf99)           | GO:0004872 (0.63) receptor activity<br>GO:0004888 (0.56) transmembrane signaling receptor activity<br>GO:0004672 (0.53) protein kinase activity<br>GO:0019199 (0.50) transmembrane receptor protein kinase activity<br>GO:0097367 (0.49) carbohydrate derivative binding<br>GO:0035639 (0.47) purine ribonucleoside triphosphate binding<br>GO:0032559 (0.47) adenylyl ribonucleotide binding<br>GO:0032550 (0.47) purine ribonucleoside binding<br>GO:0046983 (0.39) protein dimerization activity                                 | GO:0032502 (0.68) developmental process<br>GO:0044767 (0.67) single-organism developmental process<br>GO:0048869 (0.61) cellular developmental process<br>GO:0016043 (0.61) cellular component organization<br>GO:0009653 (0.60) anatomical structure morphogenesis<br>GO:0006928 (0.58) movement of cell or subcellular component<br>GO:0048856 (0.54) anatomical structure development<br>GO:0030030 (0.54) cell projection organization<br>GO:0032989 (0.53) cellular component morphogenesis<br>GO:0048812 (0.52) neuron projection morphogenesis<br>GO:0016477 (0.52) cell migration<br>GO:0006796 (0.51) phosphate-containing compound metabolic process<br>GO:0006464 (0.51) cellular protein modification process<br>GO:0016310 (0.50) phosphorylation<br>GO:0061564 (0.48) axon development                                                                  | GO:0031224 (1.00) intrinsic component of membrane<br>GO:0016020 (1.00) membrane<br>GO:0016021 (0.95) integral component of membrane<br>GO:0005886 (0.90) plasma membrane<br>GO:0044459 (0.75) plasma membrane part<br>GO:0005887 (0.63) integral component of plasma membrane<br>GO:0031982 (0.42) vesicle<br>GO:0097458 (0.41) neuron part<br>GO:0042995 (0.40) cell projection<br>GO:0031988 (0.38) membrane-bounded vesicle<br>GO:0009986 (0.38) cell surface<br>GO:0043005 (0.35) neuron projection<br>GO:0030054 (0.35) cell junction<br>GO:0030424 (0.34) axon<br>GO:0044421 (0.32) extracellular region part |
| 13 | NX_Q3MHD2-1, LSM12. (Protein LSM12 homolog)                         | GO:0003723 (0.59) RNA binding                                                                                                                                                                                                                                                                                                                                                                                                                                                                                                       | GO:0090304 (0.79) nucleic acid metabolic process<br>GO:0016070 (0.73) RNA metabolic process<br>GO:0022618 (0.39) ribonucleoprotein complex assembly<br>GO:0000387 (0.32) spliceosomal snRNP assembly                                                                                                                                                                                                                                                                                                                                                                                                                                                                                                                                                                                                                                                                  | GO:0005576 (0.55) extracellular region<br>GO:0005829 (0.47) cytosol<br>GO:0005634 (0.33) nucleus<br>GO:0036464 (0.31) cytoplasmic ribonucleoprotein granule                                                                                                                                                                                                                                                                                                                                                                                                                                                         |
| 14 | NX_A8MVW0-1, FAM171A2. (FAM171A2)                                   | GO:1901363 (0.58) heterocyclic compound binding<br>GO:0097159 (0.58) organic                                                                                                                                                                                                                                                                                                                                                                                                                                                        | GO:0016043 (0.52) cellular component organization<br>GO:0051179 (0.49) localization                                                                                                                                                                                                                                                                                                                                                                                                                                                                                                                                                                                                                                                                                                                                                                                   | GO:0005737 (0.66) cytoplasm<br>GO:0043234 (0.64) protein complex                                                                                                                                                                                                                                                                                                                                                                                                                                                                                                                                                    |

|    |                                                                            |                                                                                                                                                                                                                                                                                                                                                                                                          |                                                                                                                                                                                                                                                                                                                                                                                                                                                                                                                                                                                                                                                                                                                                                                                                                                                                                                                                                                                                   |                                                                                                                                                                                                                                                                                                                                                                                                                                                                                                                                                           |
|----|----------------------------------------------------------------------------|----------------------------------------------------------------------------------------------------------------------------------------------------------------------------------------------------------------------------------------------------------------------------------------------------------------------------------------------------------------------------------------------------------|---------------------------------------------------------------------------------------------------------------------------------------------------------------------------------------------------------------------------------------------------------------------------------------------------------------------------------------------------------------------------------------------------------------------------------------------------------------------------------------------------------------------------------------------------------------------------------------------------------------------------------------------------------------------------------------------------------------------------------------------------------------------------------------------------------------------------------------------------------------------------------------------------------------------------------------------------------------------------------------------------|-----------------------------------------------------------------------------------------------------------------------------------------------------------------------------------------------------------------------------------------------------------------------------------------------------------------------------------------------------------------------------------------------------------------------------------------------------------------------------------------------------------------------------------------------------------|
|    |                                                                            | <p><b>cyclic compound binding</b><br/> <b>GO:0003676 (0.56) nucleic acid binding</b><br/> <b>GO:0019899 (0.54) enzyme binding</b><br/> <b>GO:0017016 (0.52) Ras GTPase binding</b><br/> GO:0022892 (0.47) substrate-specific transporter activity</p>                                                                                                                                                    | <p>GO:0006810 (0.46) transport<br/> GO:0060255 (0.42) regulation of macromolecule metabolic process<br/> GO:0006996 (0.42) organelle organization<br/> GO:0080090 (0.41) regulation of primary metabolic process<br/> GO:0031323 (0.41) regulation of cellular metabolic process<br/> GO:0048519 (0.40) negative regulation of biological process<br/> GO:0019538 (0.40) protein metabolic process<br/> GO:0051171 (0.39) regulation of nitrogen compound metabolic process<br/> GO:0050896 (0.39) response to stimulus<br/> GO:0048523 (0.39) negative regulation of cellular process<br/> GO:0032879 (0.39) regulation of localization<br/> GO:0016192 (0.39) vesicle-mediated transport<br/> GO:0010468 (0.39) regulation of gene expression</p>                                                                                                                                                                                                                                               | <p><b>GO:0031982 (0.53) vesicle</b><br/> <b>GO:0031988 (0.52) membrane-bounded vesicle</b><br/> <b>GO:0044421 (0.51) extracellular region part</b><br/> GO:0070062 (0.48) extracellular exosome<br/> GO:0005634 (0.48) nucleus<br/> GO:0044428 (0.40) nuclear part<br/> GO:0016020 (0.40) membrane<br/> GO:0005829 (0.35) cytosol<br/> GO:0031090 (0.34) organelle membrane</p>                                                                                                                                                                           |
| 15 | <p>NX_Q0P5P2-1,<br/> C17orf67.<br/> (Uncharacterized protein C17orf67)</p> | <p><b>GO:0043169 (0.58) cation binding</b><br/> <b>GO:0004112 (0.58) cyclic-nucleotide phosphodiesterase activity</b><br/> GO:0032561 (0.48) guanyl ribonucleotide binding<br/> GO:0030551 (0.48) cyclic nucleotide binding</p>                                                                                                                                                                          | <p>GO:0046068 (0.48) cGMP metabolic process<br/> GO:0009214 (0.48) cyclic nucleotide catabolic process<br/> GO:0009154 (0.48) purine ribonucleotide catabolic process<br/> GO:2000243 (0.37) positive regulation of reproductive process<br/> GO:1900542 (0.37) regulation of purine nucleotide metabolic process<br/> GO:0090075 (0.37) relaxation of muscle<br/> GO:0071902 (0.37) positive regulation of protein serine/threonine kinase activity<br/> GO:0060281 (0.37) regulation of oocyte development<br/> GO:0055117 (0.37) regulation of cardiac muscle contraction<br/> GO:0050868 (0.37) negative regulation of T cell activation<br/> GO:0050672 (0.37) negative regulation of lymphocyte proliferation<br/> GO:0045988 (0.37) negative regulation of striated muscle contraction<br/> GO:0045822 (0.37) negative regulation of heart contraction<br/> GO:0043902 (0.37) positive regulation of multi-organism process<br/> GO:0043410 (0.37) positive regulation of MAPK cascade</p> | <p><b>GO:0005829 (0.53) cytosol</b><br/> GO:0005737 (0.47) cytoplasm<br/> GO:0016020 (0.33) membrane</p>                                                                                                                                                                                                                                                                                                                                                                                                                                                  |
| 16 | <p>NX_Q9BQA9-1,<br/> C17orf62.<br/> (Uncharacterized protein C17orf62)</p> | <p><b>GO:0035639 (0.57) purine ribonucleoside triphosphate binding</b><br/> <b>GO:0032559 (0.57) adenylyl ribonucleotide binding</b><br/> <b>GO:0032550 (0.57) purine ribonucleoside binding</b><br/> GO:0051427 (0.37) hormone receptor binding<br/> GO:0031701 (0.37) angiotensin receptor binding<br/> GO:0005126 (0.37) cytokine receptor binding<br/> GO:0004672 (0.37) protein kinase activity</p> | <p><b>GO:0044351 (0.83) macropinocytosis</b><br/> GO:0048870 (0.32) cell motility<br/> GO:0048869 (0.32) cellular developmental process<br/> GO:0046777 (0.32) protein autophosphorylation<br/> GO:0018108 (0.32) peptidyl-tyrosine phosphorylation<br/> GO:0008283 (0.32) cell proliferation<br/> GO:0007165 (0.32) signal transduction<br/> GO:0006955 (0.32) immune response<br/> GO:0006952 (0.32) defense response</p>                                                                                                                                                                                                                                                                                                                                                                                                                                                                                                                                                                       | <p><b>GO:0043232 (0.79) intracellular non-membrane-bounded organelle</b><br/> <b>GO:0044430 (0.74) cytoskeletal part</b><br/> <b>GO:0005856 (0.74) cytoskeleton</b><br/> <b>GO:0005737 (0.74) cytoplasm</b><br/> <b>GO:0005874 (0.68) microtubule</b><br/> <b>GO:0005829 (0.68) cytosol</b><br/> <b>GO:0005871 (0.63) kinesin complex</b><br/> <b>GO:0016020 (0.53) membrane</b><br/> <b>GO:0005634 (0.53) nucleus</b><br/> GO:0005815 (0.42) microtubule organizing center<br/> GO:0005819 (0.37) spindle<br/> GO:0005876 (0.32) spindle microtubule</p> |
| 17 | <p>NX_Q96T59-1,<br/> CDRT15.</p>                                           | <p><b>GO:0030234 (0.57) enzyme regulator activity</b></p>                                                                                                                                                                                                                                                                                                                                                | <p><b>GO:0006810 (0.68) transport</b><br/> <b>GO:0016043 (0.57) cellular component</b></p>                                                                                                                                                                                                                                                                                                                                                                                                                                                                                                                                                                                                                                                                                                                                                                                                                                                                                                        | <p><b>GO:0016020 (0.79) membrane</b><br/> <b>GO:0043234 (0.54) protein</b></p>                                                                                                                                                                                                                                                                                                                                                                                                                                                                            |

|    |                                                                          |                                                                                                                                                                                                                                                                                                                                                                                                                                                                                                                                                                                                        |                                                                                                                                                                                                                                                                                                                                                                                                                                                                                                                                                                                                                                                                                                                                                                                                                                         |                                                                                                                                                                                                                                                                                                                                                                                                                                                                                                                                                                                                                                         |
|----|--------------------------------------------------------------------------|--------------------------------------------------------------------------------------------------------------------------------------------------------------------------------------------------------------------------------------------------------------------------------------------------------------------------------------------------------------------------------------------------------------------------------------------------------------------------------------------------------------------------------------------------------------------------------------------------------|-----------------------------------------------------------------------------------------------------------------------------------------------------------------------------------------------------------------------------------------------------------------------------------------------------------------------------------------------------------------------------------------------------------------------------------------------------------------------------------------------------------------------------------------------------------------------------------------------------------------------------------------------------------------------------------------------------------------------------------------------------------------------------------------------------------------------------------------|-----------------------------------------------------------------------------------------------------------------------------------------------------------------------------------------------------------------------------------------------------------------------------------------------------------------------------------------------------------------------------------------------------------------------------------------------------------------------------------------------------------------------------------------------------------------------------------------------------------------------------------------|
|    | (CMT1A duplicated region transcript 15 protein)                          | <p><b>GO:0016887 (0.55) ATPase activity</b><br/> <b>GO:0003777 (0.55) microtubule motor activity</b><br/> GO:0043178 (0.49) alcohol binding<br/> GO:0032934 (0.49) sterol binding<br/> GO:0015248 (0.49) sterol transporter activity<br/> GO:0008047 (0.49) enzyme activator activity<br/> GO:0071814 (0.40) protein-lipid complex binding<br/> GO:0070405 (0.40) ammonium ion binding<br/> GO:0042277 (0.40) peptide binding<br/> GO:0070325 (0.30) lipoprotein particle receptor binding<br/> GO:0034190 (0.30) apolipoprotein receptor binding<br/> GO:0004857 (0.30) enzyme inhibitor activity</p> | <p><b>organization</b><br/> <b>GO:0071702 (0.55) organic substance transport</b><br/> <b>GO:0006928 (0.55) movement of cell or subcellular component</b><br/> <b>GO:0007165 (0.54) signal transduction</b><br/> <b>GO:0065008 (0.53) regulation of biological quality</b><br/> <b>GO:0044707 (0.53) single-multicellular organism process</b><br/> <b>GO:0051239 (0.52) regulation of multicellular organismal process</b><br/> GO:0055092 (0.49) sterol homeostasis<br/> GO:0045940 (0.49) positive regulation of steroid metabolic process<br/> GO:0042157 (0.49) lipoprotein metabolic process<br/> GO:0034645 (0.49) cellular macromolecule biosynthetic process<br/> GO:0034377 (0.49) plasma lipoprotein particle assembly<br/> GO:0016101 (0.49) diterpenoid metabolic process<br/> GO:0015914 (0.49) phospholipid transport</p> | <p><b>complex</b><br/> <b>GO:0016021 (0.54) integral component of membrane</b><br/> GO:0044430 (0.47) cytoskeletal part<br/> GO:0005886 (0.47) plasma membrane<br/> GO:0005871 (0.44) kinesin complex<br/> GO:0070062 (0.35) extracellular exosome<br/> GO:0005829 (0.33) cytosol<br/> GO:0005634 (0.33) nucleus</p>                                                                                                                                                                                                                                                                                                                    |
| 18 | NX_Q8N2U0-1, TMEM256. (Transmembrane protein 256)                        | <p><b>GO:0022892 (0.57) substrate-specific transporter activity</b><br/> <b>GO:0017128 (0.55) phospholipid scramblase activity</b><br/> GO:0008865 (0.45) fructokinase activity<br/> GO:0004454 (0.45) ketohexokinase activity</p>                                                                                                                                                                                                                                                                                                                                                                     | <p><b>GO:0046835 (0.57) carbohydrate phosphorylation</b><br/> GO:0006810 (0.46) transport<br/> GO:0044351 (0.43) macropinocytosis</p>                                                                                                                                                                                                                                                                                                                                                                                                                                                                                                                                                                                                                                                                                                   | <p><b>GO:0070062 (0.51) extracellular exosome</b><br/> GO:0016020 (0.41) membrane</p>                                                                                                                                                                                                                                                                                                                                                                                                                                                                                                                                                   |
| 19 | NX_Q7RTS6-1, OTOP2. (Otopettrin-2)                                       | <p><b>GO:0046983 (0.55) protein dimerization activity</b><br/> <b>GO:0046873 (0.55) metal ion transmembrane transporter activity</b><br/> <b>GO:0042802 (0.55) identical protein binding</b><br/> <b>GO:0031420 (0.55) alkali metal ion binding</b><br/> <b>GO:0015077 (0.55) monovalent inorganic cation transmembrane transporter activity</b><br/> GO:0009678 (0.39) hydrogen-translocating pyrophosphatase activity<br/> GO:0004427 (0.39) inorganic diphosphatase activity</p>                                                                                                                    | <p><b>GO:0042472 (1.00) inner ear morphogenesis</b><br/> <b>GO:0009590 (0.51) detection of gravity</b><br/> GO:0045299 (0.49) otolith mineralization<br/> GO:0032475 (0.49) otolith formation<br/> GO:0098662 (0.41) inorganic cation transmembrane transport<br/> GO:0030001 (0.41) metal ion transport</p>                                                                                                                                                                                                                                                                                                                                                                                                                                                                                                                            | <p><b>GO:0016020 (0.86) membrane</b><br/> <b>GO:0016021 (0.61) integral component of membrane</b><br/> GO:0005886 (0.35) plasma membrane<br/> GO:0043234 (0.31) protein complex</p>                                                                                                                                                                                                                                                                                                                                                                                                                                                     |
| 20 | NX_A6NFU0-1, FAM187A. (Ig-like V-type domain-containing protein FAM187A) | <p><b>GO:0004872 (0.55) receptor activity</b><br/> <b>GO:0042802 (0.50) identical protein binding</b><br/> GO:0046983 (0.48) protein dimerization activity<br/> GO:0004888 (0.46) transmembrane signaling receptor activity<br/> GO:0097367 (0.42) carbohydrate derivative binding<br/> GO:0098632 (0.30) protein binding involved in cell-cell adhesion</p>                                                                                                                                                                                                                                           | <p><b>GO:0006928 (0.64) movement of cell or subcellular component</b><br/> <b>GO:0032502 (0.63) developmental process</b><br/> <b>GO:0044767 (0.60) single-organism developmental process</b><br/> <b>GO:0007411 (0.59) axon guidance</b><br/> <b>GO:0048856 (0.55) anatomical structure development</b><br/> <b>GO:0048869 (0.53) cellular developmental process</b><br/> <b>GO:0016043 (0.53) cellular component organization</b><br/> <b>GO:0051239 (0.52) regulation of multicellular organismal process</b><br/> <b>GO:0007155 (0.52) cell adhesion</b><br/> <b>GO:0048518 (0.51) positive regulation of biological process</b><br/> <b>GO:0050793 (0.50) regulation of developmental process</b></p>                                                                                                                              | <p><b>GO:0031224 (0.93) intrinsic component of membrane</b><br/> <b>GO:0016020 (0.92) membrane</b><br/> <b>GO:0016021 (0.82) integral component of membrane</b><br/> <b>GO:0005886 (0.71) plasma membrane</b><br/> <b>GO:0044459 (0.66) plasma membrane part</b><br/> <b>GO:0097458 (0.59) neuron part</b><br/> <b>GO:0044421 (0.55) extracellular region part</b><br/> <b>GO:0043005 (0.53) neuron projection</b><br/> <b>GO:0030424 (0.52) axon</b><br/> <b>GO:0031226 (0.51) intrinsic component of plasma membrane</b><br/> <b>GO:0005887 (0.50) integral component of plasma membrane</b><br/> GO:0030054 (0.43) cell junction</p> |

|    |                                                                                   |                                                                                                                                                                                                                                                                                                                                                                                                                                                                                                                                                                                                                                                                                                                                                               |                                                                                                                                                                                                                                                                                                                                                                                                                                                                                                                                                                                                                                                                                                                                                                                                                                                            |                                                                                                                                                                                                                                                                                                                                                                                                                                                                                                                                                                                                                                                                                                       |
|----|-----------------------------------------------------------------------------------|---------------------------------------------------------------------------------------------------------------------------------------------------------------------------------------------------------------------------------------------------------------------------------------------------------------------------------------------------------------------------------------------------------------------------------------------------------------------------------------------------------------------------------------------------------------------------------------------------------------------------------------------------------------------------------------------------------------------------------------------------------------|------------------------------------------------------------------------------------------------------------------------------------------------------------------------------------------------------------------------------------------------------------------------------------------------------------------------------------------------------------------------------------------------------------------------------------------------------------------------------------------------------------------------------------------------------------------------------------------------------------------------------------------------------------------------------------------------------------------------------------------------------------------------------------------------------------------------------------------------------------|-------------------------------------------------------------------------------------------------------------------------------------------------------------------------------------------------------------------------------------------------------------------------------------------------------------------------------------------------------------------------------------------------------------------------------------------------------------------------------------------------------------------------------------------------------------------------------------------------------------------------------------------------------------------------------------------------------|
|    |                                                                                   |                                                                                                                                                                                                                                                                                                                                                                                                                                                                                                                                                                                                                                                                                                                                                               | <p><b>GO:0048583 (0.50) regulation of response to stimulus</b><br/> <b>GO:0009653 (0.50) anatomical structure morphogenesis</b><br/> GO:2000026 (0.49) regulation of multicellular organismal development<br/> GO:0098609 (0.49) cell-cell adhesion</p>                                                                                                                                                                                                                                                                                                                                                                                                                                                                                                                                                                                                    | <p>GO:0043025 (0.40) neuronal cell body<br/> GO:0005737 (0.32) cytoplasm<br/> GO:0005576 (0.32) extracellular region</p>                                                                                                                                                                                                                                                                                                                                                                                                                                                                                                                                                                              |
| 21 | NX_Q5M775-1, SPECC1. (Cytospin-B)                                                 | <p><b>GO:0008092 (0.53) cytoskeletal protein binding</b><br/> GO:0046983 (0.45) protein dimerization activity<br/> GO:0042802 (0.45) identical protein binding<br/> GO:0019899 (0.45) enzyme binding<br/> GO:0003779 (0.43) actin binding<br/> GO:0042805 (0.42) actinin binding<br/> GO:0005198 (0.41) structural molecule activity<br/> GO:1901363 (0.40) heterocyclic compound binding<br/> GO:0097367 (0.40) carbohydrate derivative binding<br/> GO:0097159 (0.40) organic cyclic compound binding<br/> GO:0032403 (0.40) protein complex binding<br/> GO:0051015 (0.38) actin filament binding<br/> GO:0044389 (0.38) ubiquitin-like protein ligase binding<br/> GO:0003676 (0.38) nucleic acid binding<br/> GO:0001948 (0.38) glycoprotein binding</p> | <p><b>GO:0016043 (0.67) cellular component organization</b><br/> <b>GO:0032502 (0.62) developmental process</b><br/> <b>GO:0044767 (0.60) single-organism developmental process</b><br/> <b>GO:0006996 (0.55) organelle organization</b><br/> <b>GO:0048856 (0.51) anatomical structure development</b><br/> GO:1902589 (0.49) single-organism organelle organization<br/> GO:0007010 (0.48) cytoskeleton organization<br/> GO:0048869 (0.46) cellular developmental process<br/> GO:0051179 (0.45) localization<br/> GO:0006928 (0.43) movement of cell or subcellular component<br/> GO:0030029 (0.42) actin filament-based process<br/> GO:0009653 (0.42) anatomical structure morphogenesis<br/> GO:0030036 (0.41) actin cytoskeleton organization<br/> GO:0051641 (0.39) cellular localization<br/> GO:0022607 (0.37) cellular component assembly</p> | <p><b>GO:0044430 (0.66) cytoskeletal part</b><br/> <b>GO:0016020 (0.59) membrane</b><br/> <b>GO:0043232 (0.54) intracellular non-membrane-bounded organelle</b><br/> <b>GO:0030054 (0.51) cell junction</b><br/> <b>GO:0005856 (0.51) cytoskeleton</b><br/> GO:0005886 (0.48) plasma membrane<br/> GO:0044459 (0.47) plasma membrane part<br/> GO:0042995 (0.45) cell projection<br/> GO:0005912 (0.45) adherens junction<br/> GO:0005737 (0.42) cytoplasm<br/> GO:0030055 (0.41) cell-substrate junction<br/> GO:0005924 (0.38) cell-substrate adherens junction<br/> GO:0005911 (0.36) cell-cell junction<br/> GO:0044449 (0.35) contractile fiber part<br/> GO:0044448 (0.34) cell cortex part</p> |
| 22 | NX_O43149-1, ZZEF1. (Zinc finger ZZ-type and EF-hand domain-containing protein 1) | <p><b>GO:0016740 (0.53) transferase activity</b><br/> GO:0004842 (0.32) ubiquitin-protein transferase activity</p>                                                                                                                                                                                                                                                                                                                                                                                                                                                                                                                                                                                                                                            | <p><b>GO:0019538 (0.61) protein metabolic process</b><br/> <b>GO:0006464 (0.50) cellular protein modification process</b><br/> GO:0032446 (0.36) protein modification by small protein conjugation<br/> GO:0016567 (0.35) protein ubiquitination</p>                                                                                                                                                                                                                                                                                                                                                                                                                                                                                                                                                                                                       | <p>GO:0005634 (0.47) nucleus<br/> GO:0005737 (0.46) cytoplasm</p>                                                                                                                                                                                                                                                                                                                                                                                                                                                                                                                                                                                                                                     |
| 23 | NX_Q7Z5L0-1, VMO1. (Vitelline membrane outer layer protein 1 homolog)             | <p><b>GO:0016787 (0.53) hydrolase activity</b><br/> GO:0008061 (0.36) chitin binding<br/> GO:0004568 (0.36) chitinase activity</p>                                                                                                                                                                                                                                                                                                                                                                                                                                                                                                                                                                                                                            | <p>GO:0048856 (0.35) anatomical structure development</p>                                                                                                                                                                                                                                                                                                                                                                                                                                                                                                                                                                                                                                                                                                                                                                                                  | <p><b>GO:0070062 (1.00) extracellular exosome</b></p>                                                                                                                                                                                                                                                                                                                                                                                                                                                                                                                                                                                                                                                 |
| 24 | NX_A8MSI8-1, LYRM9. (LYR motif-containing protein 9)                              | <p><b>GO:0008137 (0.52) NADH dehydrogenase (ubiquinone) activity</b></p>                                                                                                                                                                                                                                                                                                                                                                                                                                                                                                                                                                                                                                                                                      | <p>GO:0022607 (0.41) cellular component assembly<br/> GO:0043623 (0.36) cellular protein complex assembly<br/> GO:0070271 (0.32) protein complex biogenesis<br/> GO:0033108 (0.32) mitochondrial respiratory chain complex assembly</p>                                                                                                                                                                                                                                                                                                                                                                                                                                                                                                                                                                                                                    | <p><b>GO:0005737 (0.56) cytoplasm</b><br/> <b>GO:0005739 (0.53) mitochondrion</b><br/> GO:0044421 (0.42) extracellular region part<br/> GO:0070062 (0.40) extracellular exosome<br/> GO:0016020 (0.40) membrane<br/> GO:0005576 (0.40) extracellular region</p>                                                                                                                                                                                                                                                                                                                                                                                                                                       |
| 25 | NX_Q8WU58-1, FAM222B. (FAM222B)                                                   | <p><b>GO:0003676 (0.52) nucleic acid binding</b><br/> GO:0043169 (0.32) cation binding</p>                                                                                                                                                                                                                                                                                                                                                                                                                                                                                                                                                                                                                                                                    | <p>GO:0019222 (0.33) regulation of metabolic process<br/> GO:0060255 (0.32) regulation of macromolecule metabolic process<br/> GO:0031323 (0.32) regulation of cellular metabolic process<br/> GO:0080090 (0.30) regulation of primary metabolic process<br/> GO:0010468 (0.30) regulation of gene expression</p>                                                                                                                                                                                                                                                                                                                                                                                                                                                                                                                                          | <p><b>GO:0005654 (1.00) nucleoplasm</b></p>                                                                                                                                                                                                                                                                                                                                                                                                                                                                                                                                                                                                                                                           |
| 26 | NX_Q8TC99-1, FNDC8.                                                               | <p><b>GO:0097367 (0.51) carbohydrate derivative</b></p>                                                                                                                                                                                                                                                                                                                                                                                                                                                                                                                                                                                                                                                                                                       | <p><b>GO:0032502 (0.67) developmental process</b></p>                                                                                                                                                                                                                                                                                                                                                                                                                                                                                                                                                                                                                                                                                                                                                                                                      | <p>GO:0005634 (0.96) nucleus</p>                                                                                                                                                                                                                                                                                                                                                                                                                                                                                                                                                                                                                                                                      |

|    |                                                           |                                                                                                                                                                                                                                                                                                                                                                                                                                                                                                                                                                                                                                                                                                      |                                                                                                                                                                                                                                                                                                                                                                                                                                                                                                                                                                                                                                                                                                                                                                                                                                          |                                                                                                                                                                                                                                                                                                                                                                                  |
|----|-----------------------------------------------------------|------------------------------------------------------------------------------------------------------------------------------------------------------------------------------------------------------------------------------------------------------------------------------------------------------------------------------------------------------------------------------------------------------------------------------------------------------------------------------------------------------------------------------------------------------------------------------------------------------------------------------------------------------------------------------------------------------|------------------------------------------------------------------------------------------------------------------------------------------------------------------------------------------------------------------------------------------------------------------------------------------------------------------------------------------------------------------------------------------------------------------------------------------------------------------------------------------------------------------------------------------------------------------------------------------------------------------------------------------------------------------------------------------------------------------------------------------------------------------------------------------------------------------------------------------|----------------------------------------------------------------------------------------------------------------------------------------------------------------------------------------------------------------------------------------------------------------------------------------------------------------------------------------------------------------------------------|
|    | (Fibronectin type III domain-containing protein 8)        | <b>binding</b><br><b>GO:1901363 (0.50) heterocyclic compound binding</b><br><b>GO:0097159 (0.50) organic cyclic compound binding</b><br>GO:0035639 (0.49) purine ribonucleoside triphosphate binding<br>GO:0032559 (0.49) adenylyl ribonucleotide binding<br>GO:0032550 (0.49) purine ribonucleoside binding<br>GO:0016740 (0.37) transferase activity<br>GO:0004872 (0.37) receptor activity<br>GO:0016787 (0.35) hydrolase activity<br>GO:0004888 (0.35) transmembrane signaling receptor activity<br>GO:0004672 (0.35) protein kinase activity<br>GO:0008186 (0.31) RNA-dependent ATPase activity<br>GO:0008026 (0.31) ATP-dependent helicase activity<br>GO:0003724 (0.31) RNA helicase activity | <b>GO:0044767 (0.63) single-organism developmental process</b><br><b>GO:0048856 (0.54) anatomical structure development</b><br><b>GO:0048869 (0.52) cellular developmental process</b><br>GO:0006928 (0.40) movement of cell or subcellular component<br>GO:0016043 (0.39) cellular component organization<br>GO:0019538 (0.36) protein metabolic process<br>GO:0006464 (0.35) cellular protein modification process<br>GO:0009653 (0.34) anatomical structure morphogenesis<br>GO:0006796 (0.34) phosphate-containing compound metabolic process<br>GO:0051239 (0.32) regulation of multicellular organismal process<br>GO:0007411 (0.32) axon guidance<br>GO:2000026 (0.30) regulation of multicellular organismal development<br>GO:0051128 (0.30) regulation of cellular component organization<br>GO:0016310 (0.30) phosphorylation |                                                                                                                                                                                                                                                                                                                                                                                  |
| 27 | NX_Q9C073-1, FAM117A. (FAM117A)                           | <b>GO:0022891 (0.51) substrate-specific transmembrane transporter activity</b><br>GO:0005459 (0.40) UDP-galactose transmembrane transporter activity                                                                                                                                                                                                                                                                                                                                                                                                                                                                                                                                                 | GO:0032501 (0.48) multicellular organismal process<br>GO:0044767 (0.46) single-organism developmental process<br>GO:0048856 (0.44) anatomical structure development<br>GO:0048869 (0.42) cellular developmental process<br>GO:0003008 (0.40) system process<br>GO:0051179 (0.37) localization<br>GO:0072015 (0.36) glomerular visceral epithelial cell development<br>GO:0006810 (0.36) transport<br>GO:0003094 (0.36) glomerular filtration                                                                                                                                                                                                                                                                                                                                                                                             | <b>GO:0005737 (0.57) cytoplasm</b>                                                                                                                                                                                                                                                                                                                                               |
| 28 | NX_O14894-1, TM4SF5. (Transmembrane 4 L6 family member 5) | <b>GO:0015370 (0.50) solute:sodium symporter activity</b><br><b>GO:0005326 (0.50) neurotransmitter transporter activity</b>                                                                                                                                                                                                                                                                                                                                                                                                                                                                                                                                                                          | <b>GO:0048856 (1.00) anatomical structure development</b><br><b>GO:0044767 (1.00) single-organism developmental process</b><br><b>GO:2000227 (0.64) negative regulation of pancreatic A cell differentiation</b><br><b>GO:2000077 (0.64) negative regulation of type B pancreatic cell development</b><br><b>GO:0090104 (0.64) pancreatic epsilon cell differentiation</b><br><b>GO:0031018 (0.64) endocrine pancreas development</b><br>GO:0042246 (0.36) tissue regeneration<br>GO:0044765 (0.34) single-organism transport                                                                                                                                                                                                                                                                                                            | <b>GO:0016021 (1.00) integral component of membrane</b>                                                                                                                                                                                                                                                                                                                          |
| 29 | NX_Q96MC4-1, CEP295NL. (CEP295 N-terminal-like protein)   | <b>GO:0016740 (0.50) transferase activity</b><br>GO:0036094 (0.45) small molecule binding<br>GO:1901981 (0.44) phosphatidylinositol phosphate binding<br>GO:0030234 (0.44) enzyme regulator activity<br>GO:0033218 (0.43) amide binding<br>GO:0030246 (0.43) carbohydrate binding                                                                                                                                                                                                                                                                                                                                                                                                                    | <b>GO:0051128 (0.64) regulation of cellular component organization</b><br><b>GO:0048518 (0.63) positive regulation of biological process</b><br><b>GO:0048522 (0.62) positive regulation of cellular process</b><br><b>GO:0033043 (0.61) regulation of organelle organization</b><br><b>GO:0010638 (0.58) positive regulation of organelle organization</b><br><b>GO:0016043 (0.55) cellular component organization</b><br><b>GO:0032502 (0.51) developmental</b>                                                                                                                                                                                                                                                                                                                                                                        | <b>GO:0043234 (0.63) protein complex</b><br><b>GO:0044430 (0.58) cytoskeletal part</b><br><b>GO:0005737 (0.53) cytoplasm</b><br>GO:0016020 (0.44) membrane<br>GO:0005829 (0.43) cytosol<br>GO:0043232 (0.42) intracellular non-membrane-bounded organelle<br>GO:0044428 (0.33) nuclear part<br>GO:0005634 (0.33) nucleus<br>GO:0044450 (0.30) microtubule organizing center part |



|    |                                                                         |                                                                                                                                                                                                                                                                                                                                                                                                                                                                                                                                                                                                                                       |                                                                                                                                                                                                                                                                                                                                                                                                                                                                                       |                                                                                                                                                                                                                                                                                                                                                                                                                                                                                                                                                      |
|----|-------------------------------------------------------------------------|---------------------------------------------------------------------------------------------------------------------------------------------------------------------------------------------------------------------------------------------------------------------------------------------------------------------------------------------------------------------------------------------------------------------------------------------------------------------------------------------------------------------------------------------------------------------------------------------------------------------------------------|---------------------------------------------------------------------------------------------------------------------------------------------------------------------------------------------------------------------------------------------------------------------------------------------------------------------------------------------------------------------------------------------------------------------------------------------------------------------------------------|------------------------------------------------------------------------------------------------------------------------------------------------------------------------------------------------------------------------------------------------------------------------------------------------------------------------------------------------------------------------------------------------------------------------------------------------------------------------------------------------------------------------------------------------------|
|    |                                                                         | GO:0010485 (0.43) H4 histone acetyltransferase activity<br>GO:0008375 (0.43) acetylglucosaminyltransferase activity                                                                                                                                                                                                                                                                                                                                                                                                                                                                                                                   | <b>process</b><br>GO:0044767 (0.49) single-organism developmental process<br>GO:0051179 (0.48) localization<br>GO:0006996 (0.48) organelle organization<br>GO:0048856 (0.47) anatomical structure development<br>GO:0065008 (0.44) regulation of biological quality<br>GO:0051641 (0.44) cellular localization<br>GO:0022607 (0.44) cellular component assembly<br>GO:0044267 (0.43) cellular protein metabolic process                                                               |                                                                                                                                                                                                                                                                                                                                                                                                                                                                                                                                                      |
| 30 | NX_Q9Y2Y6-1, TMEM98. (Transmembrane protein 98)                         | <b>GO:0046914 (0.50) transition metal ion binding</b><br><b>GO:0046906 (0.50) tetrapyrrole binding</b><br><b>GO:0016676 (0.50) oxidoreductase activity, acting on a heme group of donors, oxygen as acceptor</b><br><b>GO:0015078 (0.50) hydrogen ion transmembrane transporter activity</b><br><b>GO:0015002 (0.50) heme-copper terminal oxidase activity</b><br><b>GO:0009055 (0.50) electron carrier activity</b>                                                                                                                                                                                                                  | <b>GO:0098662 (0.50) inorganic cation transmembrane transport</b><br><b>GO:0046034 (0.50) ATP metabolic process</b><br><b>GO:0045333 (0.50) cellular respiration</b><br><b>GO:0016310 (0.50) phosphorylation</b><br><b>GO:0015672 (0.50) monovalent inorganic cation transport</b><br><b>GO:0006818 (0.50) hydrogen transport</b>                                                                                                                                                     | <b>GO:0005634 (0.52) nucleus</b><br>GO:0005783 (0.48) endoplasmic reticulum                                                                                                                                                                                                                                                                                                                                                                                                                                                                          |
| 31 | NX_Q8IZD0-1, SAMD14. (Sterile alpha motif domain-containing protein 14) | GO:0044877 (0.48) macromolecular complex binding<br>GO:0032403 (0.47) protein complex binding<br>GO:0051015 (0.45) actin filament binding<br>GO:1901363 (0.43) heterocyclic compound binding<br>GO:0097159 (0.43) organic cyclic compound binding<br>GO:0043169 (0.42) cation binding<br>GO:0097367 (0.41) carbohydrate derivative binding<br>GO:0017076 (0.41) purine nucleotide binding<br>GO:0035639 (0.40) purine ribonucleoside triphosphate binding<br>GO:0032559 (0.40) adenylyl ribonucleotide binding<br>GO:0032550 (0.40) purine ribonucleoside binding<br>GO:0016879 (0.40) ligase activity, forming carbon-nitrogen bonds | <b>GO:0016043 (0.64) cellular component organization</b><br><b>GO:0007165 (0.61) signal transduction</b><br>GO:0030030 (0.49) cell projection organization<br>GO:0035556 (0.47) intracellular signal transduction<br>GO:0019932 (0.46) second-messenger-mediated signaling<br>GO:0031175 (0.45) neuron projection development<br>GO:0019722 (0.45) calcium-mediated signaling<br>GO:0007015 (0.44) actin filament organization<br>GO:0044710 (0.30) single-organism metabolic process | <b>GO:0005737 (0.81) cytoplasm</b><br><b>GO:0043232 (0.61) intracellular non-membrane-bounded organelle</b><br><b>GO:0097458 (0.53) neuron part</b><br><b>GO:0042995 (0.51) cell projection</b><br><b>GO:0044456 (0.50) synapse part</b><br><b>GO:0043005 (0.50) neuron projection</b><br><b>GO:0016020 (0.50) membrane</b><br><b>GO:0005856 (0.50) cytoskeleton</b><br>GO:0015629 (0.42) actin cytoskeleton<br>GO:0014069 (0.42) postsynaptic density<br>GO:0030425 (0.38) dendrite<br>GO:0005829 (0.33) cytosol<br>GO:0005739 (0.30) mitochondrion |
| 32 | NX_A8MV24-1, C17orf98. (Uncharacterized protein C17orf98)               | GO:0015926 (0.48) glucosidase activity                                                                                                                                                                                                                                                                                                                                                                                                                                                                                                                                                                                                | GO:0051275 (0.37) beta-glucan catabolic process<br>GO:0030243 (0.37) cellulose metabolic process                                                                                                                                                                                                                                                                                                                                                                                      | <b>GO:0005576 (0.75) extracellular region</b>                                                                                                                                                                                                                                                                                                                                                                                                                                                                                                        |
| 33 | NX_Q8IYN6-1, UBALD2. (UBA-like domain-containing protein 2)             | GO:1901363 (0.46) heterocyclic compound binding<br>GO:0097159 (0.46) organic cyclic compound binding<br>GO:0043169 (0.41) cation binding<br>GO:0016491 (0.40) oxidoreductase activity<br>GO:0046906 (0.39) tetrapyrrole binding<br>GO:0016684 (0.39) oxidoreductase activity, acting on                                                                                                                                                                                                                                                                                                                                               | <b>GO:0044248 (0.53) cellular catabolic process</b><br>GO:0050896 (0.44) response to stimulus<br>GO:0044710 (0.41) single-organism metabolic process<br>GO:0006950 (0.41) response to stress<br>GO:1990748 (0.39) cellular detoxification<br>GO:0042743 (0.39) hydrogen peroxide metabolic process<br>GO:0016043 (0.38) cellular component organization                                                                                                                               | <b>GO:0005576 (0.55) extracellular region</b><br>GO:0043234 (0.44) protein complex<br>GO:0005634 (0.43) nucleus<br>GO:0044428 (0.42) nuclear part<br>GO:0044451 (0.36) nucleoplasm part<br>GO:0005737 (0.31) cytoplasm<br>GO:0005829 (0.30) cytosol                                                                                                                                                                                                                                                                                                  |

|    |                                                                      |                                                                                                                                                                                                                                                                                                                                                                                                                                                                                            |                                                                                                                                                                                                                                                                                                                                                                                                                                                                                                                                                                                                                                                                                                                                                                                                                                                                                 |                                                                                                                                                                                                                                                                                                                                                                                                                                                                                                                                                                                                                                           |
|----|----------------------------------------------------------------------|--------------------------------------------------------------------------------------------------------------------------------------------------------------------------------------------------------------------------------------------------------------------------------------------------------------------------------------------------------------------------------------------------------------------------------------------------------------------------------------------|---------------------------------------------------------------------------------------------------------------------------------------------------------------------------------------------------------------------------------------------------------------------------------------------------------------------------------------------------------------------------------------------------------------------------------------------------------------------------------------------------------------------------------------------------------------------------------------------------------------------------------------------------------------------------------------------------------------------------------------------------------------------------------------------------------------------------------------------------------------------------------|-------------------------------------------------------------------------------------------------------------------------------------------------------------------------------------------------------------------------------------------------------------------------------------------------------------------------------------------------------------------------------------------------------------------------------------------------------------------------------------------------------------------------------------------------------------------------------------------------------------------------------------------|
|    |                                                                      | peroxide as acceptor<br>GO:0016209 (0.39) antioxidant activity                                                                                                                                                                                                                                                                                                                                                                                                                             |                                                                                                                                                                                                                                                                                                                                                                                                                                                                                                                                                                                                                                                                                                                                                                                                                                                                                 |                                                                                                                                                                                                                                                                                                                                                                                                                                                                                                                                                                                                                                           |
| 34 | NX_Q86X02-1, CDR2L. (Cerebellar degeneration-related protein 2-like) | GO:0016787 (0.46) hydrolase activity<br>GO:0017111 (0.45) nucleoside-triphosphatase activity<br>GO:0008092 (0.37) cytoskeletal protein binding<br>GO:1901363 (0.35) heterocyclic compound binding<br>GO:0097159 (0.35) organic cyclic compound binding<br>GO:0035639 (0.33) purine ribonucleoside triphosphate binding<br>GO:0032559 (0.33) adenylyl ribonucleotide binding<br>GO:0032550 (0.33) purine ribonucleoside binding                                                             | <b>GO:0016043 (0.52) cellular component organization</b><br>GO:0006996 (0.44) organelle organization<br>GO:0022607 (0.37) cellular component assembly<br>GO:0007010 (0.36) cytoskeleton organization<br>GO:0070925 (0.33) organelle assembly<br>GO:0043933 (0.31) macromolecular complex subunit organization<br>GO:0043623 (0.30) cellular protein complex assembly                                                                                                                                                                                                                                                                                                                                                                                                                                                                                                            | <b>GO:0044430 (0.87) cytoskeletal part</b><br><b>GO:0005737 (0.80) cytoplasm</b><br><b>GO:0043234 (0.64) protein complex</b><br><b>GO:0043232 (0.61) intracellular non-membrane-bounded organelle</b><br><b>GO:0016459 (0.54) myosin complex</b><br>GO:0016020 (0.49) membrane<br>GO:0042995 (0.32) cell projection<br>GO:0032982 (0.31) myosin filament<br>GO:0031988 (0.30) membrane-bounded vesicle                                                                                                                                                                                                                                    |
| 35 | NX_B2RV13-1, C17orf105. (Uncharacterized protein C17orf105)          | GO:0016740 (0.44) transferase activity<br>GO:0004842 (0.41) ubiquitin-protein transferase activity<br>GO:0004185 (0.36) serine-type carboxypeptidase activity<br>GO:0004181 (0.36) metalloproteinase activity                                                                                                                                                                                                                                                                              | <b>GO:0019538 (0.94) protein metabolic process</b><br><b>GO:0006464 (0.51) cellular protein modification process</b><br>GO:0042787 (0.49) protein ubiquitination involved in ubiquitin-dependent protein catabolic process<br>GO:1901564 (0.47) organonitrogen compound metabolic process<br>GO:0043603 (0.47) cellular amide metabolic process<br>GO:0016485 (0.44) protein processing<br>GO:0006518 (0.44) peptide metabolic process                                                                                                                                                                                                                                                                                                                                                                                                                                          | <b>GO:0005737 (0.88) cytoplasm</b><br><b>GO:0005634 (0.81) nucleus</b><br><b>GO:0005829 (0.76) cytosol</b><br><b>GO:0044428 (0.54) nuclear part</b><br><b>GO:0016020 (0.51) membrane</b><br><b>GO:0005654 (0.51) nucleoplasm</b><br>GO:0044421 (0.48) extracellular region part<br>GO:0044454 (0.45) nuclear chromosome part<br>GO:0005615 (0.44) extracellular space<br>GO:0000790 (0.41) nuclear chromatin                                                                                                                                                                                                                              |
| 36 | NX_Q2TAC2-1, CCDC57. (Coiled-coil domain-containing protein 57)      | GO:0097367 (0.44) carbohydrate derivative binding<br>GO:0035639 (0.41) purine ribonucleoside triphosphate binding<br>GO:0032559 (0.41) adenylyl ribonucleotide binding<br>GO:0032550 (0.41) purine ribonucleoside binding<br>GO:0052813 (0.31) phosphatidylinositol bisphosphate kinase activity<br>GO:0052742 (0.31) phosphatidylinositol kinase activity<br>GO:0035004 (0.31) phosphatidylinositol 3-kinase activity<br>GO:0016307 (0.31) phosphatidylinositol phosphate kinase activity | <b>GO:0016043 (0.56) cellular component organization</b><br><b>GO:0048518 (0.50) positive regulation of biological process</b><br>GO:0060255 (0.48) regulation of macromolecule metabolic process<br>GO:0010604 (0.46) positive regulation of macromolecule metabolic process<br>GO:0035556 (0.43) intracellular signal transduction<br>GO:0010468 (0.43) regulation of gene expression<br>GO:0048017 (0.41) inositol lipid-mediated signaling<br>GO:1901576 (0.34) organic substance biosynthetic process<br>GO:0044249 (0.34) cellular biosynthetic process<br>GO:0032502 (0.34) developmental process<br>GO:0044767 (0.33) single-organism developmental process<br>GO:0006796 (0.33) phosphate-containing compound metabolic process<br>GO:0044710 (0.32) single-organism metabolic process<br>GO:0016310 (0.32) phosphorylation<br>GO:0046834 (0.31) lipid phosphorylation | <b>GO:0016020 (1.00) membrane</b><br><b>GO:0043234 (0.90) protein complex</b><br><b>GO:0005942 (0.85) phosphatidylinositol 3-kinase complex</b><br><b>GO:0005737 (0.74) cytoplasm</b><br><b>GO:0005886 (0.69) plasma membrane</b><br><b>GO:0005829 (0.60) cytosol</b><br>GO:0044430 (0.47) cytoskeletal part<br>GO:0044421 (0.35) extracellular region part<br>GO:0005773 (0.34) vacuole<br>GO:0044428 (0.33) nuclear part<br>GO:0043232 (0.32) intracellular non-membrane-bounded organelle<br>GO:0042995 (0.32) cell projection<br>GO:0031982 (0.32) vesicle<br>GO:0031988 (0.31) membrane-bounded vesicle<br>GO:0005634 (0.30) nucleus |
| 37 | NX_Q8N3J3-1, C17orf53. (Uncharacterized protein C17orf53)            | GO:0016787 (0.43) hydrolase activity<br>GO:0004175 (0.37) endopeptidase activity<br>GO:0004252 (0.36) serine-type endopeptidase activity                                                                                                                                                                                                                                                                                                                                                   | <b>GO:0016043 (0.62) cellular component organization</b><br><b>GO:0048518 (0.60) positive regulation of biological process</b><br><b>GO:0051179 (0.58) localization</b><br><b>GO:0048519 (0.58) negative regulation of biological process</b><br><b>GO:0065008 (0.57) regulation of biological quality</b><br><b>GO:0048523 (0.57) negative regulation</b>                                                                                                                                                                                                                                                                                                                                                                                                                                                                                                                      | <b>GO:0005576 (0.91) extracellular region</b><br><b>GO:0044421 (0.70) extracellular region part</b><br><b>GO:0005615 (0.67) extracellular space</b><br><b>GO:0031982 (0.55) vesicle</b><br><b>GO:0031988 (0.54) membrane-bounded vesicle</b><br><b>GO:0070062 (0.53) extracellular</b>                                                                                                                                                                                                                                                                                                                                                    |

|    |                                                                                    |                                                                                                                                                                                                                                                                                                                                                                                                                                                                                                                      |                                                                                                                                                                                                                                                                                                                                                                                                                                                                                                                                                                                                                                                                                                                                                   |                                                                                                                                                                                                                                                                                                                                                                                                 |
|----|------------------------------------------------------------------------------------|----------------------------------------------------------------------------------------------------------------------------------------------------------------------------------------------------------------------------------------------------------------------------------------------------------------------------------------------------------------------------------------------------------------------------------------------------------------------------------------------------------------------|---------------------------------------------------------------------------------------------------------------------------------------------------------------------------------------------------------------------------------------------------------------------------------------------------------------------------------------------------------------------------------------------------------------------------------------------------------------------------------------------------------------------------------------------------------------------------------------------------------------------------------------------------------------------------------------------------------------------------------------------------|-------------------------------------------------------------------------------------------------------------------------------------------------------------------------------------------------------------------------------------------------------------------------------------------------------------------------------------------------------------------------------------------------|
|    |                                                                                    |                                                                                                                                                                                                                                                                                                                                                                                                                                                                                                                      | <p><b>of cellular process</b><br/> <b>GO:0006810 (0.57) transport</b><br/> <b>GO:0051239 (0.54) regulation of multicellular organismal process</b><br/> <b>GO:0048583 (0.54) regulation of response to stimulus</b><br/> <b>GO:1902578 (0.53) single-organism localization</b><br/> <b>GO:0048584 (0.52) positive regulation of response to stimulus</b><br/> <b>GO:0044765 (0.52) single-organism transport</b><br/> <b>GO:0016192 (0.52) vesicle-mediated transport</b><br/> <b>GO:0051240 (0.51) positive regulation of multicellular organismal process</b><br/> <b>GO:0042127 (0.51) regulation of cell proliferation</b></p>                                                                                                                | <p><b>exosome</b><br/> <b>GO:0016020 (0.53) membrane</b><br/> GO:0005886 (0.36) plasma membrane<br/> GO:0005737 (0.30) cytoplasm</p>                                                                                                                                                                                                                                                            |
| 38 | NX_Q9BSJ5-1, C17orf80. (Uncharacterized protein C17orf80)                          | GO:1901363 (0.43) heterocyclic compound binding<br>GO:0097159 (0.43) organic cyclic compound binding<br>GO:0097367 (0.40) carbohydrate derivative binding<br>GO:0035639 (0.39) purine ribonucleoside triphosphate binding<br>GO:0032559 (0.39) adenylyl ribonucleotide binding<br>GO:0032550 (0.39) purine ribonucleoside binding<br>GO:0008092 (0.35) cytoskeletal protein binding<br>GO:0003676 (0.35) nucleic acid binding<br>GO:0043169 (0.30) cation binding                                                    | GO:0032501 (0.47) multicellular organismal process<br>GO:0044767 (0.46) single-organism developmental process<br>GO:0016043 (0.46) cellular component organization<br>GO:0065008 (0.44) regulation of biological quality<br>GO:0044707 (0.37) single-multicellular organism process<br>GO:0006996 (0.33) organelle organization<br>GO:0051239 (0.30) regulation of multicellular organismal process                                                                                                                                                                                                                                                                                                                                               | <p><b>GO:0070062 (0.97) extracellular exosome</b></p>                                                                                                                                                                                                                                                                                                                                           |
| 39 | NX_Q96N21-1, TEPSIN. (AP-4 complex accessory subunit Tepsin)                       | GO:0043167 (0.43) ion binding<br>GO:0043169 (0.42) cation binding                                                                                                                                                                                                                                                                                                                                                                                                                                                    |                                                                                                                                                                                                                                                                                                                                                                                                                                                                                                                                                                                                                                                                                                                                                   | <p><b>GO:0043234 (0.63) protein complex</b><br/> <b>GO:0005737 (0.60) cytoplasm</b><br/> GO:0016020 (0.41) membrane<br/> GO:0044428 (0.38) nuclear part<br/> GO:0043232 (0.33) intracellular non-membrane-bounded organelle<br/> GO:1902494 (0.32) catalytic complex<br/> GO:1990234 (0.31) transferase complex<br/> GO:0005634 (0.30) nucleus</p>                                              |
| 40 | NX_Q71RG4-1, TMUB2. (Transmembrane and ubiquitin-like domain-containing protein 2) | GO:1990841 (0.41) promoter-specific chromatin binding<br>GO:0051718 (0.41) DNA (cytosine-5-)-methyltransferase activity, acting on CpG substrates<br>GO:0045322 (0.41) unmethylated CpG binding<br>GO:0042826 (0.41) histone deacetylase binding<br>GO:0030331 (0.41) estrogen receptor binding<br>GO:0019904 (0.41) protein domain specific binding<br>GO:0008327 (0.41) methyl-CpG binding<br>GO:0008270 (0.41) zinc ion binding<br>GO:0003723 (0.41) RNA binding<br>GO:0003690 (0.41) double-stranded DNA binding | <p><b>GO:0019538 (0.78) protein metabolic process</b><br/> <b>GO:0019941 (0.63) modification-dependent protein catabolic process</b><br/> <b>GO:0006511 (0.62) ubiquitin-dependent protein catabolic process</b><br/> <b>GO:0043412 (0.56) macromolecule modification</b><br/> <b>GO:0071840 (0.54) cellular component organization or biogenesis</b><br/> <b>GO:0016043 (0.53) cellular component organization</b><br/> GO:0048519 (0.49) negative regulation of biological process<br/> GO:0080090 (0.48) regulation of primary metabolic process<br/> GO:0060255 (0.48) regulation of macromolecule metabolic process<br/> GO:0090304 (0.47) nucleic acid metabolic process<br/> GO:0051246 (0.47) regulation of protein metabolic process</p> | <p><b>GO:0005634 (1.00) nucleus</b><br/> <b>GO:0044428 (0.89) nuclear part</b><br/> <b>GO:0005737 (0.81) cytoplasm</b><br/> <b>GO:0005654 (0.79) nucleoplasm</b><br/> <b>GO:0043234 (0.64) protein complex</b><br/> GO:0044427 (0.44) chromosomal part<br/> GO:0043025 (0.44) neuronal cell body<br/> GO:0005721 (0.43) pericentric heterochromatin<br/> GO:0005657 (0.43) replication fork</p> |

|    |                                                                    |                                                                                            |                                                                                                                                                                                                                                                                                                                                                                                                                                                                                                                                                                                                                                                                                                                                                                                             |                                                                                                                                                                                                                                                                                                                                                                                                                      |
|----|--------------------------------------------------------------------|--------------------------------------------------------------------------------------------|---------------------------------------------------------------------------------------------------------------------------------------------------------------------------------------------------------------------------------------------------------------------------------------------------------------------------------------------------------------------------------------------------------------------------------------------------------------------------------------------------------------------------------------------------------------------------------------------------------------------------------------------------------------------------------------------------------------------------------------------------------------------------------------------|----------------------------------------------------------------------------------------------------------------------------------------------------------------------------------------------------------------------------------------------------------------------------------------------------------------------------------------------------------------------------------------------------------------------|
|    |                                                                    |                                                                                            | GO:0050896 (0.47) response to stimulus<br>GO:0048523 (0.47) negative regulation of cellular process<br>GO:0043161 (0.47) proteasome-mediated ubiquitin-dependent protein catabolic process<br>GO:0031323 (0.47) regulation of cellular metabolic process                                                                                                                                                                                                                                                                                                                                                                                                                                                                                                                                    |                                                                                                                                                                                                                                                                                                                                                                                                                      |
| 41 | NX_P84157-1, MXRA7. (Matrix-remodeling-associated protein 7)       | GO:0003676 (0.40) nucleic acid binding                                                     | GO:0050896 (0.43) response to stimulus<br>GO:0051716 (0.37) cellular response to stimulus<br>GO:0006950 (0.31) response to stress                                                                                                                                                                                                                                                                                                                                                                                                                                                                                                                                                                                                                                                           | <b>GO:0005634 (0.59) nucleus</b><br><b>GO:0044428 (0.53) nuclear part</b><br>GO:0009986 (0.30) cell surface                                                                                                                                                                                                                                                                                                          |
| 42 | NX_Q86X59-1, C17orf82. (Putative uncharacterized protein C17orf82) | GO:0015926 (0.39) glucosidase activity<br>GO:0003676 (0.34) nucleic acid binding           | <b>GO:0016043 (0.55) cellular component organization</b><br><b>GO:0032502 (0.52) developmental process</b><br>GO:0048856 (0.48) anatomical structure development<br>GO:0051179 (0.45) localization<br>GO:0006810 (0.44) transport<br>GO:0043933 (0.42) macromolecular complex subunit organization<br>GO:0022607 (0.42) cellular component assembly<br>GO:0065003 (0.39) macromolecular complex assembly<br>GO:0051641 (0.39) cellular localization<br>GO:0051649 (0.38) establishment of localization in cell<br>GO:0048731 (0.38) system development<br>GO:0006139 (0.38) nucleobase-containing compound metabolic process<br>GO:0090304 (0.37) nucleic acid metabolic process<br>GO:0034622 (0.37) cellular macromolecular complex assembly<br>GO:0046907 (0.36) intracellular transport | <b>GO:0005576 (0.53) extracellular region</b><br>GO:0016020 (0.48) membrane<br>GO:0005737 (0.44) cytoplasm<br>GO:0043234 (0.39) protein complex<br>GO:0005886 (0.33) plasma membrane                                                                                                                                                                                                                                 |
| 43 | NX_Q8WXE0-1, CASKIN2. (Caskin-2)                                   | GO:0016740 (0.39) transferase activity<br>GO:0019899 (0.31) enzyme binding                 | GO:0007165 (0.41) signal transduction                                                                                                                                                                                                                                                                                                                                                                                                                                                                                                                                                                                                                                                                                                                                                       | <b>GO:0005737 (0.60) cytoplasm</b><br>GO:0005634 (0.36) nucleus                                                                                                                                                                                                                                                                                                                                                      |
| 44 | NX_O43760-1, SYNGR2. (Synaptogyrin-2)                              | GO:0043169 (0.37) cation binding                                                           | <b>GO:0006810 (0.66) transport</b><br><b>GO:0051649 (0.64) establishment of localization in cell</b><br><b>GO:0051641 (0.64) cellular localization</b><br><b>GO:0006605 (0.52) protein targeting</b><br>GO:0051049 (0.31) regulation of transport                                                                                                                                                                                                                                                                                                                                                                                                                                                                                                                                           | <b>GO:0031594 (1.00) neuromuscular junction</b><br><b>GO:0030672 (1.00) synaptic vesicle membrane</b>                                                                                                                                                                                                                                                                                                                |
| 45 | NX_Q8NAA5-1, LRRC75A. (Leucine-rich repeat-containing protein 75A) | GO:0030234 (0.37) enzyme regulator activity<br>GO:0004857 (0.36) enzyme inhibitor activity | GO:0044767 (0.48) single-organism developmental process<br>GO:0065009 (0.45) regulation of molecular function<br>GO:0050790 (0.44) regulation of catalytic activity<br>GO:0051239 (0.43) regulation of multicellular organismal process<br>GO:0019222 (0.40) regulation of metabolic process<br>GO:0048518 (0.39) positive regulation of biological process<br>GO:0044092 (0.39) negative regulation of molecular function<br>GO:0009057 (0.39) macromolecule catabolic process<br>GO:0060255 (0.38) regulation of macromolecule metabolic process<br>GO:0050793 (0.38) regulation of developmental process<br>GO:0031323 (0.38) regulation of cellular                                                                                                                                     | <b>GO:0005737 (0.69) cytoplasm</b><br><b>GO:0043234 (0.58) protein complex</b><br><b>GO:0016020 (0.57) membrane</b><br>GO:0005886 (0.45) plasma membrane<br>GO:0044421 (0.38) extracellular region part<br>GO:0005634 (0.37) nucleus<br>GO:0031988 (0.36) membrane-bounded vesicle<br>GO:0070062 (0.35) extracellular exosome<br>GO:0031224 (0.32) intrinsic component of membrane<br>GO:0044428 (0.31) nuclear part |

|    |                                                                    |                                                                                                                                                |                                                                                                                                                                                                                                                                                                                                                                                                                                                                                                                                                                                                                                                           |                                                                                                                                                                                                                                                                                                                                                           |
|----|--------------------------------------------------------------------|------------------------------------------------------------------------------------------------------------------------------------------------|-----------------------------------------------------------------------------------------------------------------------------------------------------------------------------------------------------------------------------------------------------------------------------------------------------------------------------------------------------------------------------------------------------------------------------------------------------------------------------------------------------------------------------------------------------------------------------------------------------------------------------------------------------------|-----------------------------------------------------------------------------------------------------------------------------------------------------------------------------------------------------------------------------------------------------------------------------------------------------------------------------------------------------------|
|    |                                                                    |                                                                                                                                                | metabolic process<br>GO:2000026 (0.37) regulation of multicellular organismal development<br>GO:0090304 (0.37) nucleic acid metabolic process<br>GO:0044265 (0.37) cellular macromolecule catabolic process<br>GO:0080090 (0.36) regulation of primary metabolic process                                                                                                                                                                                                                                                                                                                                                                                  |                                                                                                                                                                                                                                                                                                                                                           |
| 46 | NX_P34910-1, EVI2B. (EVI2B)                                        | GO:0005198 (0.37) structural molecule activity                                                                                                 | GO:0051179 (0.43) localization<br>GO:0051234 (0.42) establishment of localization<br>GO:0006810 (0.41) transport<br>GO:0051649 (0.39) establishment of localization in cell<br>GO:0051641 (0.39) cellular localization<br>GO:0046907 (0.37) intracellular transport<br>GO:0071702 (0.34) organic substance transport<br>GO:0051169 (0.33) nuclear transport<br>GO:0050658 (0.32) RNA transport<br>GO:0045184 (0.32) establishment of protein localization                                                                                                                                                                                                 | <b>GO:0005887 (1.00) integral component of plasma membrane</b>                                                                                                                                                                                                                                                                                            |
| 47 | NX_Q96A25-1, TMEM106A. (Transmembrane protein 106A)                | GO:0008236 (0.36) serine-type peptidase activity<br>GO:0004175 (0.36) endopeptidase activity                                                   | <b>GO:0048813 (1.00) dendrite morphogenesis</b><br><b>GO:0032418 (1.00) lysosome localization</b><br><b>GO:0007041 (0.93) lysosomal transport</b><br><b>GO:0007040 (0.93) lysosome organization</b>                                                                                                                                                                                                                                                                                                                                                                                                                                                       | <b>GO:0016020 (0.97) membrane</b>                                                                                                                                                                                                                                                                                                                         |
| 48 | NX_Q8NEP4-1, C17orf47. (Uncharacterized protein C17orf47)          | GO:1901363 (0.37) heterocyclic compound binding<br>GO:0097159 (0.37) organic cyclic compound binding<br>GO:0003676 (0.35) nucleic acid binding |                                                                                                                                                                                                                                                                                                                                                                                                                                                                                                                                                                                                                                                           | <b>GO:0043234 (0.68) protein complex</b><br>GO:0005737 (0.41) cytoplasm<br>GO:1990234 (0.34) transferase complex<br>GO:0043232 (0.33) intracellular non-membrane-bounded organelle<br>GO:0016020 (0.33) membrane                                                                                                                                          |
| 49 | NX_Q9NWM3-1, CUEDC1. (CUE domain-containing protein 1)             | GO:0022892 (0.35) substrate-specific transporter activity<br>GO:0019899 (0.32) enzyme binding                                                  | <b>GO:0006796 (0.55) phosphate-containing compound metabolic process</b><br><b>GO:0016310 (0.52) phosphorylation</b>                                                                                                                                                                                                                                                                                                                                                                                                                                                                                                                                      | <b>GO:0005634 (0.85) nucleus</b><br><b>GO:0005737 (0.75) cytoplasm</b><br><b>GO:0044428 (0.66) nuclear part</b><br><b>GO:0016020 (0.60) membrane</b><br><b>GO:0043234 (0.58) protein complex</b><br><b>GO:0070062 (0.56) extracellular exosome</b><br><b>GO:0005643 (0.54) nuclear pore</b><br>GO:0005829 (0.36) cytosol<br>GO:0005654 (0.30) nucleoplasm |
| 50 | NX_Q96QE4-1, LRRC37B. (Leucine-rich repeat-containing protein 37B) | GO:0005215 (0.35) transporter activity<br>GO:0022892 (0.34) substrate-specific transporter activity                                            | GO:0007165 (0.45) signal transduction<br>GO:0032502 (0.42) developmental process<br>GO:0044767 (0.41) single-organism developmental process<br>GO:0051179 (0.35) localization<br>GO:0016043 (0.35) cellular component organization<br>GO:0051641 (0.34) cellular localization<br>GO:0006810 (0.34) transport<br>GO:0051649 (0.33) establishment of localization in cell<br>GO:0008104 (0.33) protein localization<br>GO:0048583 (0.32) regulation of response to stimulus<br>GO:0006886 (0.32) intracellular protein transport<br>GO:0007166 (0.31) cell surface receptor signaling pathway<br>GO:0031323 (0.30) regulation of cellular metabolic process | GO:0005737 (0.49) cytoplasm<br>GO:0044421 (0.30) extracellular region part                                                                                                                                                                                                                                                                                |
| 51 | NX_Q8N6N6-1, NATD1.                                                | GO:0004402 (0.33) histone acetyltransferase activity                                                                                           | <b>GO:0006473 (0.68) protein acetylation</b><br>GO:0018393 (0.44) internal peptidyl-lysine                                                                                                                                                                                                                                                                                                                                                                                                                                                                                                                                                                | <b>GO:0043234 (0.64) protein complex</b>                                                                                                                                                                                                                                                                                                                  |

|    |                                                                |                                                                                                                                                                                                                          |                                                                                                                                                                                                                                                                                                                                                                                                                                                                                                                                                                                                                                                                                                                |                                                                                                                                                                                                                                                                                                                                                                                                                                                                                                                                                                                                                    |
|----|----------------------------------------------------------------|--------------------------------------------------------------------------------------------------------------------------------------------------------------------------------------------------------------------------|----------------------------------------------------------------------------------------------------------------------------------------------------------------------------------------------------------------------------------------------------------------------------------------------------------------------------------------------------------------------------------------------------------------------------------------------------------------------------------------------------------------------------------------------------------------------------------------------------------------------------------------------------------------------------------------------------------------|--------------------------------------------------------------------------------------------------------------------------------------------------------------------------------------------------------------------------------------------------------------------------------------------------------------------------------------------------------------------------------------------------------------------------------------------------------------------------------------------------------------------------------------------------------------------------------------------------------------------|
|    | (NATD1)                                                        |                                                                                                                                                                                                                          | acetylation<br>GO:0001702 (0.37) gastrulation with mouth forming second<br>GO:0016573 (0.35) histone acetylation<br>GO:0006474 (0.35) N-terminal protein amino acid acetylation                                                                                                                                                                                                                                                                                                                                                                                                                                                                                                                                | <b>GO:0031248 (0.55) protein acetyltransferase complex</b><br>GO:0005737 (0.36) cytoplasm<br>GO:0044428 (0.33) nuclear part<br>GO:0044427 (0.33) chromosomal part<br>GO:0005634 (0.30) nucleus                                                                                                                                                                                                                                                                                                                                                                                                                     |
| 52 | NX_Q71RC9-1, SMIM5.<br>(Small integral membrane protein 5)     | GO:0051015 (0.33) actin filament binding<br>GO:0030274 (0.33) LIM domain binding<br>GO:0017166 (0.33) vinculin binding<br>GO:0005200 (0.33) structural constituent of cytoskeleton<br>GO:0005178 (0.33) integrin binding | GO:0098876 (0.48) vesicle-mediated transport to the plasma membrane<br>GO:0071702 (0.48) organic substance transport<br>GO:0051278 (0.48) fungal-type cell wall polysaccharide biosynthetic process<br>GO:0045184 (0.48) establishment of protein localization<br>GO:0030010 (0.48) establishment of cell polarity<br>GO:0006892 (0.48) post-Golgi vesicle-mediated transport<br>GO:0006038 (0.48) cell wall chitin biosynthetic process<br>GO:0000281 (0.48) mitotic cytokinesis<br>GO:0070527 (0.33) platelet aggregation<br>GO:0030866 (0.33) cortical actin cytoskeleton organization<br>GO:0007044 (0.33) cell-substrate junction assembly<br>GO:0007016 (0.33) cytoskeletal anchoring at plasma membrane | <b>GO:0016020 (0.93) membrane</b><br><b>GO:0043234 (0.60) protein complex</b><br><b>GO:0044431 (0.53) Golgi apparatus part</b><br><b>GO:0005794 (0.53) Golgi apparatus</b><br>GO:0031988 (0.47) membrane-bounded vesicle<br>GO:0005737 (0.47) cytoplasm<br>GO:0070062 (0.40) extracellular exosome<br>GO:0044430 (0.40) cytoskeletal part<br>GO:0034044 (0.40) exomer complex<br>GO:0005925 (0.40) focal adhesion<br>GO:0005886 (0.40) plasma membrane<br>GO:0005856 (0.40) cytoskeleton<br>GO:0032587 (0.33) ruffle membrane<br>GO:0009986 (0.33) cell surface<br>GO:0005815 (0.33) microtubule organizing center |
| 53 | NX_Q96GE4-1, CEP95.<br>(Centrosomal protein of 95 kDa)         | GO:0035639 (0.32) purine ribonucleoside triphosphate binding<br>GO:0032559 (0.32) adenylyl ribonucleotide binding<br>GO:0032550 (0.32) purine ribonucleoside binding<br>GO:0003676 (0.32) nucleic acid binding           | GO:0016043 (0.38) cellular component organization                                                                                                                                                                                                                                                                                                                                                                                                                                                                                                                                                                                                                                                              | <b>GO:0005813 (1.00) centrosome</b><br><b>GO:000922 (1.00) spindle pole</b>                                                                                                                                                                                                                                                                                                                                                                                                                                                                                                                                        |
| 54 | NX_Q9BU68-1, PRR15L.<br>(Proline-rich protein 15-like protein) | GO:0044877 (0.31) macromolecular complex binding<br>GO:0005524 (0.31) ATP binding<br>GO:0004672 (0.31) protein kinase activity                                                                                           | GO:0018108 (0.42) peptidyl-tyrosine phosphorylation<br>GO:0008283 (0.42) cell proliferation<br>GO:0006955 (0.42) immune response<br>GO:0006952 (0.42) defense response<br>GO:2001236 (0.31) regulation of extrinsic apoptotic signaling pathway<br>GO:2001234 (0.31) negative regulation of apoptotic signaling pathway<br>GO:0043068 (0.31) positive regulation of programmed cell death<br>GO:0022610 (0.31) biological adhesion                                                                                                                                                                                                                                                                             | <b>GO:0005737 (0.84) cytoplasm</b><br><b>GO:0016020 (0.74) membrane</b><br><b>GO:0044459 (0.58) plasma membrane part</b><br><b>GO:0005829 (0.58) cytosol</b><br>GO:0098590 (0.37) plasma membrane region<br>GO:0005886 (0.37) plasma membrane<br>GO:0043234 (0.32) protein complex<br>GO:0005634 (0.32) nucleus                                                                                                                                                                                                                                                                                                    |
| 55 | NX_A8MU93-1, C17orf100.<br>(Uncharacterized protein C17orf100) |                                                                                                                                                                                                                          | <b>GO:0030308 (0.84) negative regulation of cell growth</b>                                                                                                                                                                                                                                                                                                                                                                                                                                                                                                                                                                                                                                                    | <b>GO:0005737 (0.88) cytoplasm</b><br><b>GO:0005634 (0.81) nucleus</b><br><b>GO:0043234 (0.77) protein complex</b><br><b>GO:0016459 (0.76) myosin complex</b><br><b>GO:0031988 (0.60) membrane-bounded vesicle</b><br><b>GO:0016020 (0.59) membrane</b><br>GO:0042995 (0.44) cell projection<br>GO:0016023 (0.44) cytoplasmic, membrane-bounded vesicle<br>GO:0044421 (0.30) extracellular region part<br>GO:0030139 (0.30) endocytic vesicle<br>GO:0005886 (0.30) plasma membrane                                                                                                                                 |
| 56 | NX_Q969W3-1, FAM104A.<br>(FAM104A)                             |                                                                                                                                                                                                                          | <b>GO:0006950 (0.81) response to stress</b><br><b>GO:0042276 (0.80) error-prone translesion synthesis</b>                                                                                                                                                                                                                                                                                                                                                                                                                                                                                                                                                                                                      | <b>GO:0043234 (0.85) protein complex</b><br><b>GO:0005634 (0.84) nucleus</b>                                                                                                                                                                                                                                                                                                                                                                                                                                                                                                                                       |

|    |                                                                         |  |                                                                                                                                                                                                                                                                                                                                                                                                                                                         |                                                                                                                                                                                                                                                                                                                                                                                                                                                                                                                                                                                                                                                  |
|----|-------------------------------------------------------------------------|--|---------------------------------------------------------------------------------------------------------------------------------------------------------------------------------------------------------------------------------------------------------------------------------------------------------------------------------------------------------------------------------------------------------------------------------------------------------|--------------------------------------------------------------------------------------------------------------------------------------------------------------------------------------------------------------------------------------------------------------------------------------------------------------------------------------------------------------------------------------------------------------------------------------------------------------------------------------------------------------------------------------------------------------------------------------------------------------------------------------------------|
|    |                                                                         |  |                                                                                                                                                                                                                                                                                                                                                                                                                                                         | <p><b>GO:0061695 (0.81) transferase complex, transferring phosphorus-containing groups</b><br/> <b>GO:0016035 (0.80) zeta DNA polymerase complex</b><br/> <b>GO:0005829 (0.68) cytosol</b><br/> <b>GO:0016020 (0.57) membrane</b><br/> <b>GO:0005737 (0.57) cytoplasm</b><br/> <b>GO:0031982 (0.51) vesicle</b><br/> <b>GO:0005886 (0.51) plasma membrane</b><br/> GO:0043232 (0.45) intracellular non-membrane-bounded organelle<br/> GO:0031410 (0.45) cytoplasmic vesicle<br/> GO:0030054 (0.45) cell junction<br/> GO:0044459 (0.40) plasma membrane part<br/> GO:0031988 (0.40) membrane-bounded vesicle<br/> GO:0005773 (0.40) vacuole</p> |
| 57 | NX_P0DI83-1, RAB34.<br>(Ras-related protein Rab-34, isoform NARR)       |  | <p><b>GO:0032502 (0.51) developmental process</b><br/> GO:0016043 (0.32) cellular component organization<br/> GO:0080090 (0.31) regulation of primary metabolic process<br/> GO:0060255 (0.31) regulation of macromolecule metabolic process<br/> GO:0031323 (0.31) regulation of cellular metabolic process<br/> GO:0031326 (0.30) regulation of cellular biosynthetic process</p>                                                                     | <p>GO:0016020 (0.46) membrane<br/> GO:0043234 (0.43) protein complex<br/> GO:0031224 (0.36) intrinsic component of membrane<br/> GO:0016021 (0.31) integral component of membrane</p>                                                                                                                                                                                                                                                                                                                                                                                                                                                            |
| 58 | NX_O60309-1, LRRC37A3.<br>(Leucine-rich repeat-containing protein 37A3) |  | <p>GO:0007165 (0.47) signal transduction<br/> GO:0032502 (0.45) developmental process<br/> GO:0044767 (0.44) single-organism developmental process<br/> GO:0016043 (0.35) cellular component organization<br/> GO:0048583 (0.34) regulation of response to stimulus<br/> GO:0007166 (0.32) cell surface receptor signaling pathway<br/> GO:0009653 (0.31) anatomical structure morphogenesis<br/> GO:0019222 (0.30) regulation of metabolic process</p> | <p>GO:0005737 (0.38) cytoplasm</p>                                                                                                                                                                                                                                                                                                                                                                                                                                                                                                                                                                                                               |
| 59 | NX_A6NM11-1, LRRC37A2.<br>(Leucine-rich repeat-containing protein 37A2) |  | <p>GO:0007165 (0.45) signal transduction<br/> GO:0032502 (0.44) developmental process<br/> GO:0044767 (0.42) single-organism developmental process<br/> GO:0016043 (0.35) cellular component organization<br/> GO:0048583 (0.32) regulation of response to stimulus<br/> GO:0007166 (0.30) cell surface receptor signaling pathway</p>                                                                                                                  | <p>GO:0005737 (0.37) cytoplasm</p>                                                                                                                                                                                                                                                                                                                                                                                                                                                                                                                                                                                                               |
| 60 | NX_Q96MW1-1, CCDC43.<br>(Coiled-coil domain-containing protein 43)      |  | <p>GO:0006810 (0.44) transport<br/> GO:0046907 (0.41) intracellular transport<br/> GO:0006886 (0.38) intracellular protein transport<br/> GO:0006606 (0.35) protein import into nucleus<br/> GO:0006607 (0.32) NLS-bearing protein import into nucleus</p>                                                                                                                                                                                              | <p><b>GO:0005829 (0.70) cytosol</b><br/> <b>GO:0044428 (0.66) nuclear part</b><br/> <b>GO:0005737 (0.53) cytoplasm</b><br/> <b>GO:0005654 (0.51) nucleoplasm</b><br/> <b>GO:0016020 (0.50) membrane</b><br/> GO:0043234 (0.43) protein complex<br/> GO:0043228 (0.37) non-membrane-bounded organelle<br/> GO:0031090 (0.37) organelle membrane<br/> GO:0005643 (0.35) nuclear pore<br/> GO:0044463 (0.33) cell projection part<br/> GO:0043232 (0.32) intracellular non-</p>                                                                                                                                                                     |

|    |                                                                                  |  |                                                                                                                                                                                                                                                                                                                       |                                                                                                                                                                                                                                                                                                                                                                                                                                                                                                                                                                                                                                 |
|----|----------------------------------------------------------------------------------|--|-----------------------------------------------------------------------------------------------------------------------------------------------------------------------------------------------------------------------------------------------------------------------------------------------------------------------|---------------------------------------------------------------------------------------------------------------------------------------------------------------------------------------------------------------------------------------------------------------------------------------------------------------------------------------------------------------------------------------------------------------------------------------------------------------------------------------------------------------------------------------------------------------------------------------------------------------------------------|
|    |                                                                                  |  |                                                                                                                                                                                                                                                                                                                       | membrane-bounded organelle<br>GO:0030054 (0.31) cell junction                                                                                                                                                                                                                                                                                                                                                                                                                                                                                                                                                                   |
| 61 | NX_A6NMS7-1,<br>LRRC37A.<br>(Leucine-rich repeat-containing protein 37A)         |  | GO:0032502 (0.44) developmental process<br>GO:0007165 (0.44) signal transduction<br>GO:0044767 (0.42) single-organism developmental process<br>GO:0016043 (0.35) cellular component organization<br>GO:0048583 (0.32) regulation of response to stimulus<br>GO:0007166 (0.30) cell surface receptor signaling pathway | GO:0005737 (0.38) cytoplasm                                                                                                                                                                                                                                                                                                                                                                                                                                                                                                                                                                                                     |
| 62 | NX_Q9H0J4-1,<br>QRICH2.<br>(Glutamine-rich protein 2)                            |  | GO:0016043 (0.43) cellular component organization<br>GO:0006996 (0.31) organelle organization<br>GO:0007017 (0.30) microtubule-based process                                                                                                                                                                          | GO:0044430 (0.40) cytoskeletal part<br>GO:0043234 (0.36) protein complex                                                                                                                                                                                                                                                                                                                                                                                                                                                                                                                                                        |
| 63 | NX_A4FU69-1,<br>EFCAB5.<br>(EF-hand calcium-binding domain-containing protein 5) |  | GO:0016043 (0.40) cellular component organization<br>GO:0032502 (0.32) developmental process<br>GO:0044767 (0.31) single-organism developmental process                                                                                                                                                               |                                                                                                                                                                                                                                                                                                                                                                                                                                                                                                                                                                                                                                 |
| 64 | NX_Q2M2W7-1,<br>C17orf58.<br>(UPF0450 protein C17orf58)                          |  | GO:0052548 (0.37) regulation of endopeptidase activity<br>GO:0010466 (0.37) negative regulation of peptidase activity                                                                                                                                                                                                 | <b>GO:0005615 (0.67) extracellular space</b><br><b>GO:0005576 (0.67) extracellular region</b><br><b>GO:0031988 (0.60) membrane-bounded vesicle</b><br><b>GO:0070062 (0.53) extracellular exosome</b><br>GO:0016020 (0.33) membrane                                                                                                                                                                                                                                                                                                                                                                                              |
| 65 | NX_Q0P670-1,<br>SPEM2.<br>(Uncharacterized protein SPEM2)                        |  | GO:0044767 (0.36) single-organism developmental process                                                                                                                                                                                                                                                               | <b>GO:0043234 (0.57) protein complex</b><br><b>GO:0005737 (0.53) cytoplasm</b><br>GO:0044428 (0.31) nuclear part<br>GO:0043232 (0.31) intracellular non-membrane-bounded organelle<br>GO:0016020 (0.31) membrane                                                                                                                                                                                                                                                                                                                                                                                                                |
| 66 | NX_Q8WW18-1,<br>C17orf50.<br>(Uncharacterized protein C17orf50)                  |  |                                                                                                                                                                                                                                                                                                                       | <b>GO:0005737 (1.00) cytoplasm</b><br><b>GO:0043657 (0.90) host cell</b><br><b>GO:0070062 (0.77) extracellular exosome</b><br><b>GO:0016020 (0.77) membrane</b><br><b>GO:0005829 (0.77) cytosol</b><br><b>GO:0005634 (0.77) nucleus</b><br><b>GO:0044428 (0.56) nuclear part</b><br>GO:0072372 (0.37) primary cilium<br>GO:0034399 (0.37) nuclear periphery<br>GO:0031965 (0.37) nuclear membrane<br>GO:0015630 (0.37) microtubule cytoskeleton<br>GO:0005739 (0.37) mitochondrion<br>GO:0005694 (0.37) chromosome<br>GO:0000775 (0.37) chromosome, centromeric region<br>GO:0000159 (0.37) protein phosphatase type 2A complex |
